# Supplementary material for: Ent-Abietane Diterpenoids from Euphorbia fischeriana and Their Cytotoxic Activities
Source: MDPI journal article supplement (doi:10.3390/molecules27217258), 2022-10-26
Supplement: s1 [file s1]

# ***Ent*-abietane Diterpenoids from *Euphorbia fischeriana* and Their Cytotoxic Activities**

**Qin-Feng Zhu<sup>†</sup>, Guo-Bo Xu<sup>†</sup>, Shang-Gao Liao<sup>\*</sup> and Xue-Long Yan<sup>\*</sup>**

School of Pharmacy, Guizhou Medical University, Dongqing Road, Guiyang, 550025, China

<sup>\*</sup> Correspondence: lshangg@163.com (S.-G. L); yanxlong54@163.com (X.-L. Y).

<sup>†</sup> These authors contributed equally to this work.

| <b>Contents</b>                                                                                                  | <b>Page</b> |
|------------------------------------------------------------------------------------------------------------------|-------------|
| <b>Figure S1.</b> $^1\text{H}$ NMR spectrum of <b>1</b> in $\text{CDCl}_3$                                       | 3           |
| <b>Figure S2.</b> $^{13}\text{C}$ NMR and DEPT spectrum of <b>1</b> in $\text{CDCl}_3$                           | 3           |
| <b>Figure S3.</b> HSQC spectrum of <b>1</b> in $\text{CDCl}_3$                                                   | 4           |
| <b>Figure S4.</b> HMBC spectrum of <b>1</b> in $\text{CDCl}_3$                                                   | 4           |
| <b>Figure S5.</b> $^1\text{H}$ – $^1\text{H}$ COSY spectrum of <b>1</b> in $\text{CDCl}_3$                       | 5           |
| <b>Figure S6.</b> NOESY spectrum of <b>1</b> in $\text{CDCl}_3$                                                  | 5           |
| <b>Figure S7.</b> HRESIMS spectrum of <b>1</b>                                                                   | 6           |
| <b>Figure S8.</b> IR spectrum of <b>1</b>                                                                        | 7           |
| <b>Figure S9.</b> $^1\text{H}$ NMR spectrum of <b>2</b> in $\text{CDCl}_3$                                       | 7           |
| <b>Figure S10.</b> $^{13}\text{C}$ NMR spectrum of <b>2</b> in $\text{CDCl}_3$                                   | 8           |
| <b>Figure S11.</b> HSQC spectrum of <b>2</b> in $\text{CDCl}_3$                                                  | 8           |
| <b>Figure S12.</b> HMBC spectrum of <b>2</b> in $\text{CDCl}_3$                                                  | 9           |
| <b>Figure S13.</b> $^1\text{H}$ – $^1\text{H}$ COSY spectrum of <b>2</b> in $\text{CDCl}_3$                      | 9           |
| <b>Figure S14.</b> NOESY spectrum of <b>2</b> in $\text{CDCl}_3$                                                 | 10          |
| <b>Figure S15.</b> HRESIMS spectrum of <b>2</b>                                                                  | 11          |
| <b>Figure S16.</b> IR spectrum of <b>2</b>                                                                       | 12          |
| <b>NMR and ECD calculation method of compound 1</b>                                                              |             |
| <b>Figure S17.</b> Structures of isomers <b>1a</b> – <b>1d</b>                                                   | 13          |
| <b>Table S1.</b> Conformers and Boltzmann distributions of the optimized <b>1a</b>                               | 13          |
| <b>Table S2.</b> Cartesian coordinates of optimized <b>1a</b>                                                    | 14          |
| <b>Table S3.</b> Conformers and Boltzmann distributions of the optimized <b>1b</b>                               | 20          |
| <b>Table S4.</b> Cartesian coordinates of optimized <b>1b</b>                                                    | 20          |
| <b>Table S5.</b> Conformers and Boltzmann distributions of the optimized <b>1c</b>                               | 27          |
| <b>Table S6.</b> Cartesian coordinates of optimized <b>1c</b>                                                    | 27          |
| <b>Table S7.</b> Conformers and Boltzmann distributions of the optimized <b>1d</b>                               | 35          |
| <b>Table S8.</b> Cartesian coordinates of optimized <b>1d</b>                                                    | 35          |
| <b>Table S9.</b> DP4+ analysis of compound <b>1</b>                                                              | 41          |
| <b>Figure S18.</b> Experimental and calculated ECD spectra of <b>1</b>                                           | 41          |
| <b>NMR and ECD calculation method of compound 2</b>                                                              |             |
| <b>Figure S19.</b> Optimized geometries of dominant conformers of conformer <b>2a</b> and <b>2b</b>              | 42          |
| <b>Table S10.</b> Energy analysis of <b>2</b>                                                                    | 42          |
| <b>Table S11.</b> Cartesian coordinates of optimized <b>2</b>                                                    | 42          |
| <b>Figure S20.</b> Linear correlation plots of predicted versus experimental $^{13}\text{C}$ NMR chemical shifts | 45          |
| <b>Table S12.</b> Parameters of the calculated $^{13}\text{C}$ NMR chemical shifts of <b>2</b>                   | 45          |
| <b>Figure S21.</b> Experimental and calculated ECD spectra of <b>2</b>                                           | 46          |
| <b>Figure S22.</b> $^1\text{H}$ NMR spectrum of <b>3</b> in $\text{CDCl}_3$                                      | 47          |
| <b>Figure S23.</b> HRESIMS spectrum of <b>3</b>                                                                  | 48          |
| <b>Figure S24.</b> $^1\text{H}$ NMR spectrum of <b>4</b> in $\text{CDCl}_3$                                      | 49          |
| <b>Figure S25.</b> HRESIMS spectrum of <b>4</b>                                                                  | 50          |
| <b>Table S13.</b> NMR Data for compounds <b>1</b> – <b>2</b> in $\text{CDCl}_3$                                  | 51          |

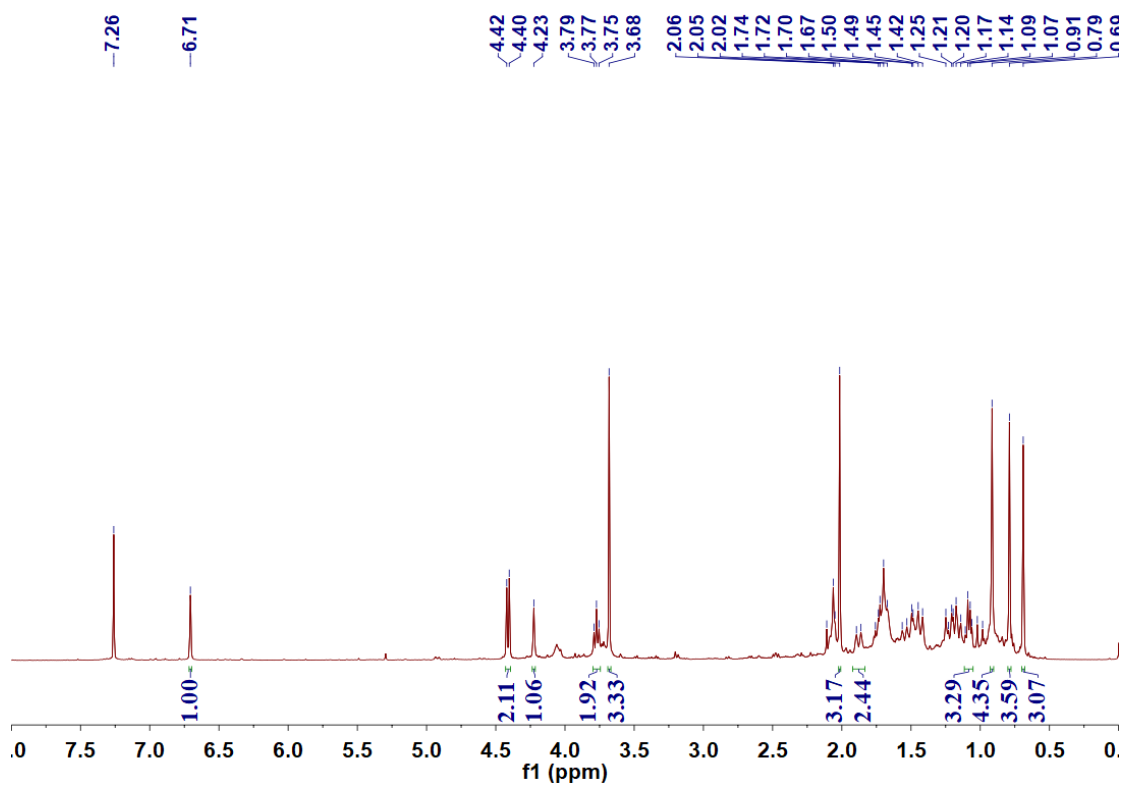

Figure S1.  $^1\text{H}$  NMR spectrum of **1** in  $\text{CDCl}_3$

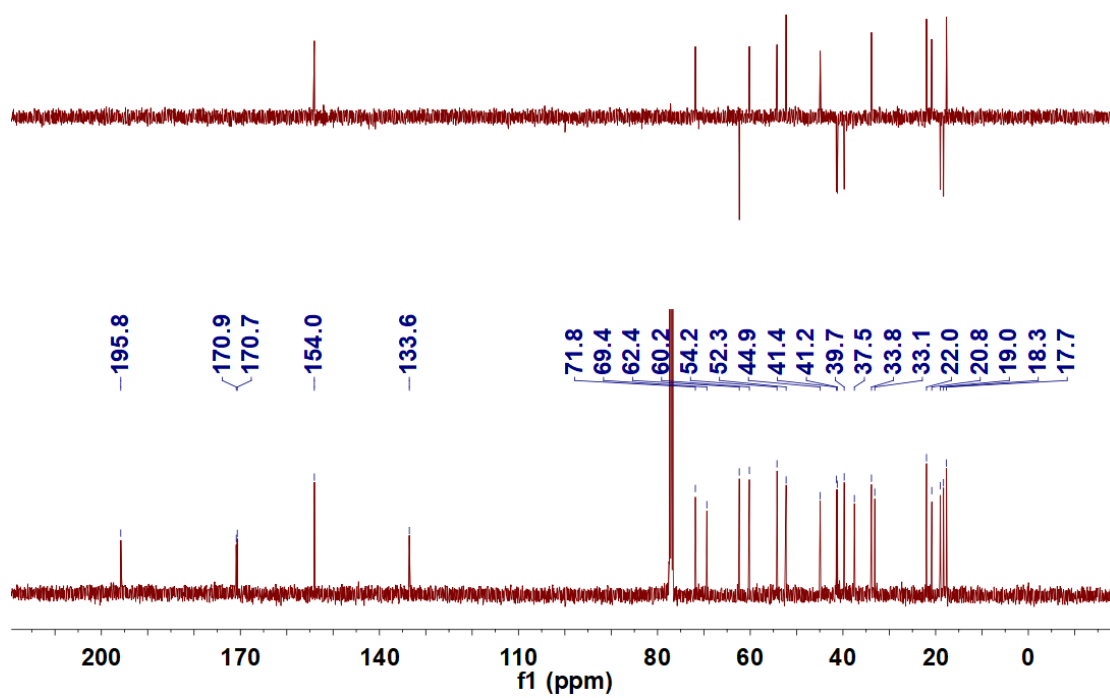

Figure S2.  $^{13}\text{C}$  NMR and DEPT spectrum of **1** in  $\text{CDCl}_3$

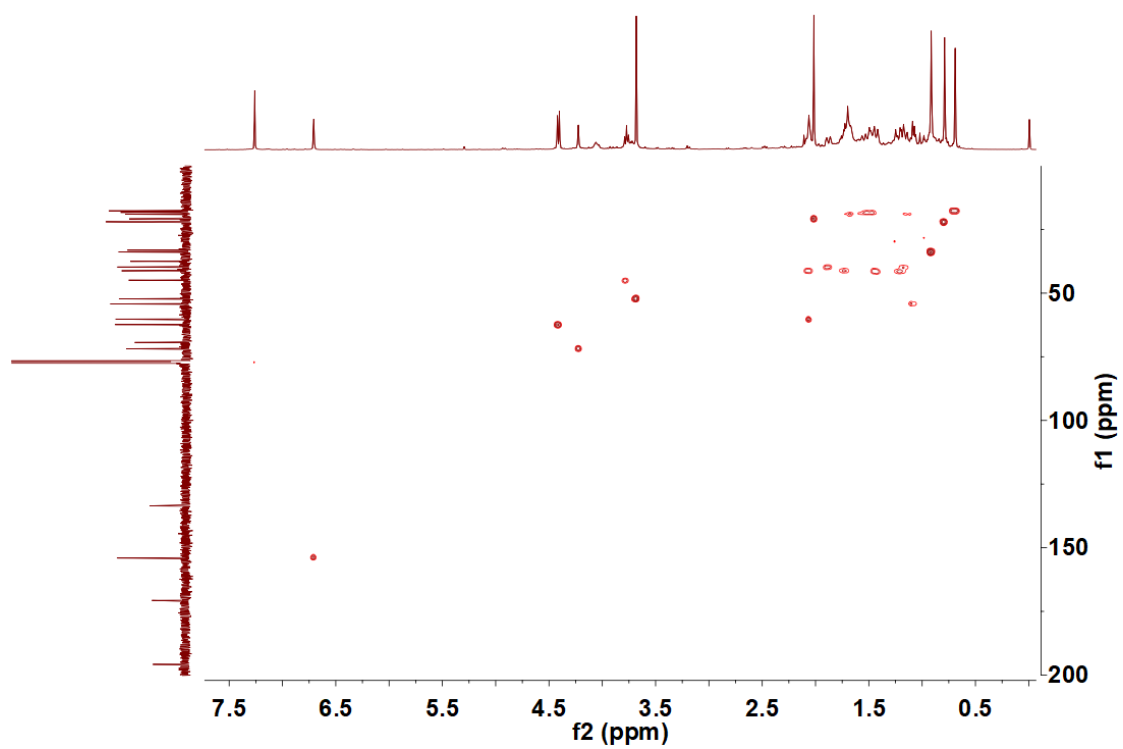

Figure S3. HSQC spectrum of **1** in CDCl<sub>3</sub>

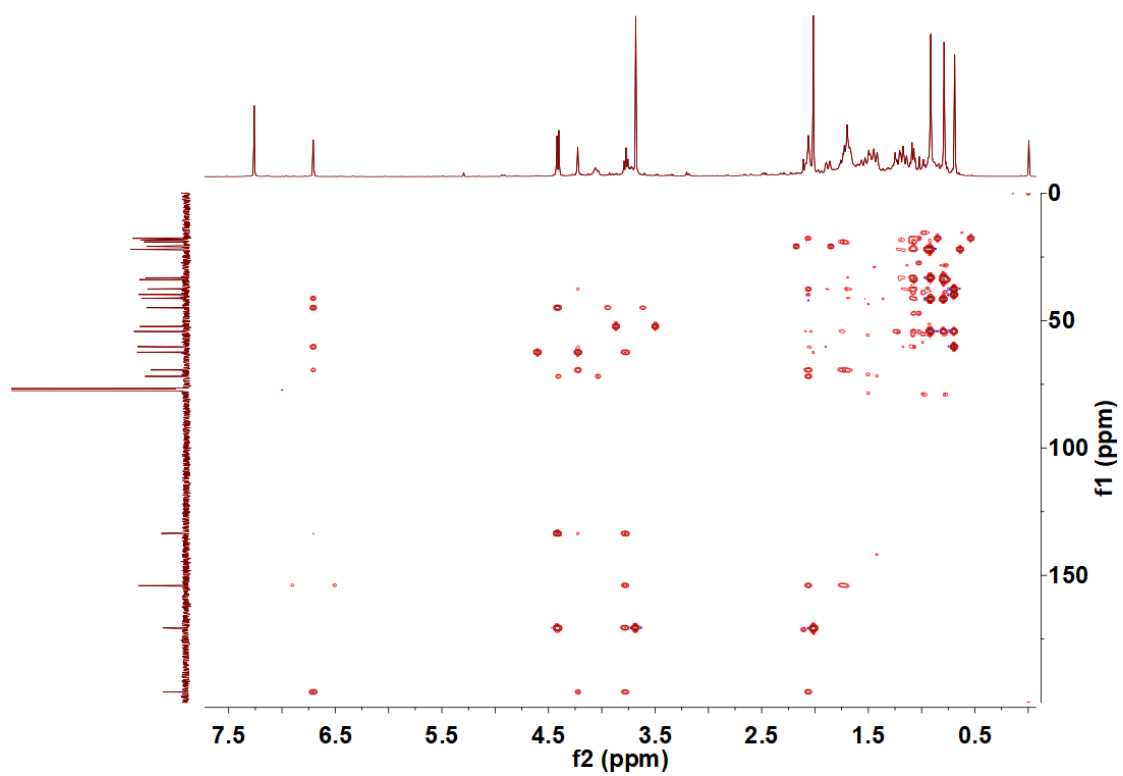

Figure S4. HMBC spectrum of **1** in CDCl<sub>3</sub>

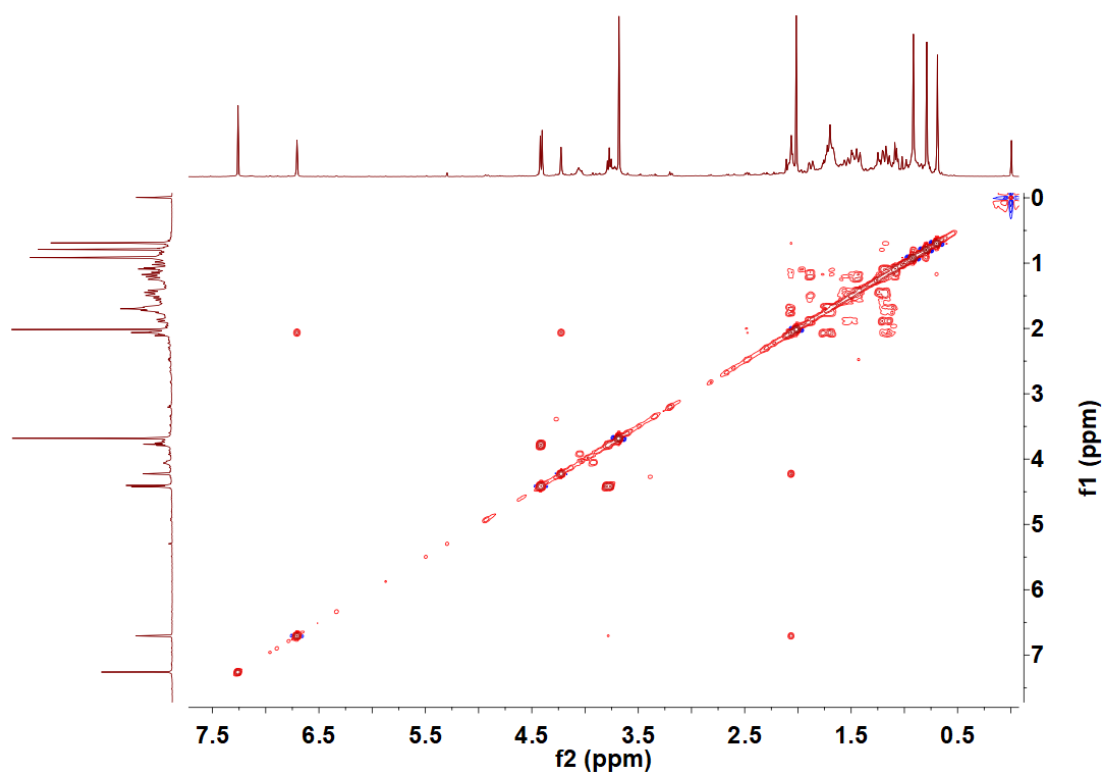

Figure S5.  $^1\text{H}$ – $^1\text{H}$  COSY spectrum of **1** in  $\text{CDCl}_3$

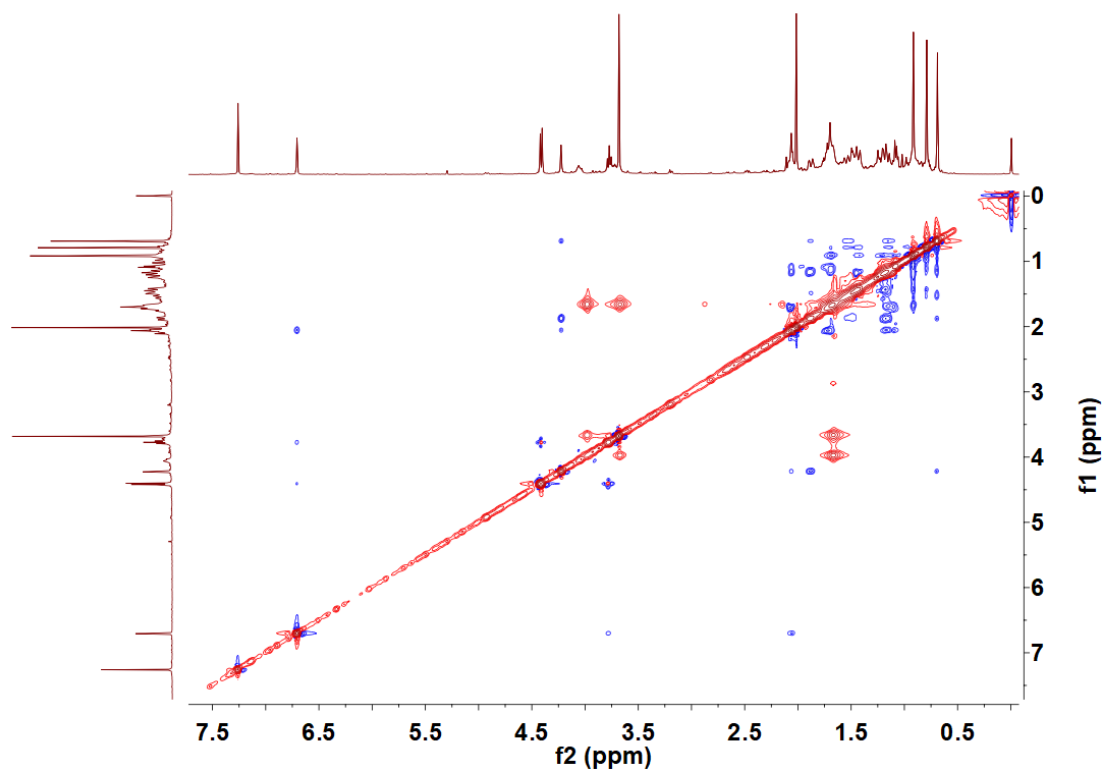

Figure S6. NOESY spectrum of **1** in  $\text{CDCl}_3$

| Elmt | Val. | Min | Max | Elmt | Val. | Min | Max | Elmt | Val. | Min | Max | Use Adduct |
|------|------|-----|-----|------|------|-----|-----|------|------|-----|-----|------------|
| H    | 1    | 0   | 40  | O    | 2    | 0   | 7   | Cl   | 1    | 0   | 0   | H          |
| 2H   | 1    | 0   | 0   | F    | 1    | 0   | 0   | Se   | 2    | 0   | 0   | Na         |
| B    | 3    | 0   | 0   | Si   | 4    | 0   | 0   | Br   | 1    | 0   | 0   | K          |
| C    | 4    | 0   | 30  | P    | 3    | 0   | 0   | I    | 3    | 0   | 0   | N4         |
| N    | 3    | 0   | 1   | S    | 2    | 0   | 0   |      |      |     |     | Cl         |

Error Margin (ppm): 20

HC Ratio: unlimited

Max Isotopes: all

MSn Iso RI (%): 75.00

DBE Range: -1.0 - 1000.0

Apply N Rule: yes

Isotope RI (%): 1.00

MSn Logic Mode: AND

Electron Ions: both

Use MSn Info: no

Isotope Res: 10000

Max Results: 20

Event#: 1 MS(E+) Ret. Time: 1.253 Scan#: 189

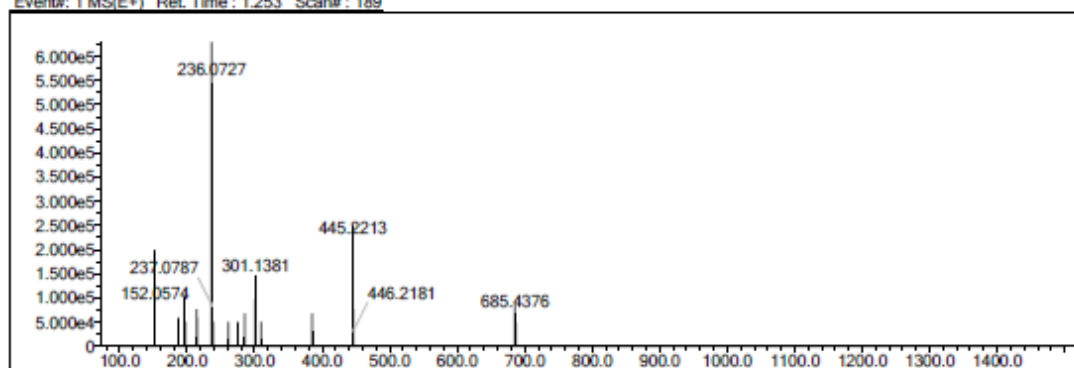

Measured region for 445.2213 m/z

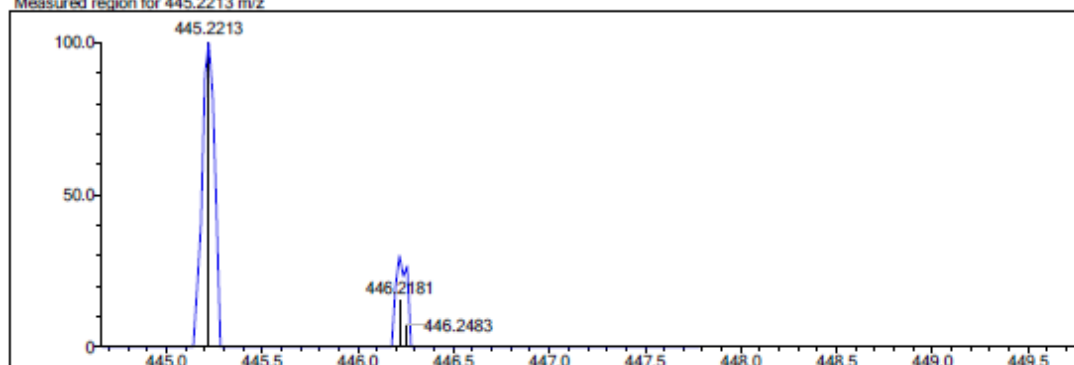

C23 H34 O7 [M+Na]+ : Predicted region for 445.2197 m/z

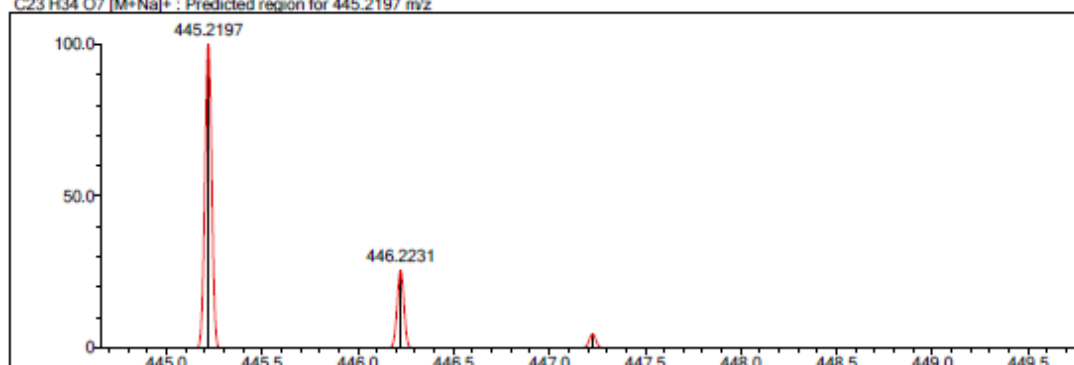

| Rank | Score | Formula (M) | Ion     | Meas. m/z | Pred. m/z | Df. (mDa) | Df. (ppm) | Iso   | DBE |
|------|-------|-------------|---------|-----------|-----------|-----------|-----------|-------|-----|
| 1    | 72.90 | C23 H34 O7  | [M+Na]+ | 445.2213  | 445.2197  | 1.6       | 3.58      | 77.95 | 7.0 |

Figure S7. HRESIMS spectrum of **1**

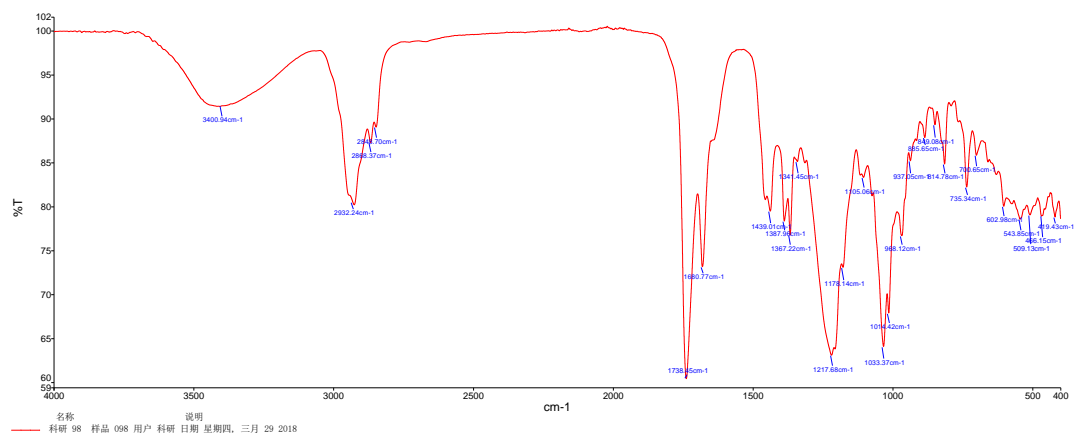

Figure S8. IR spectrum of **1**

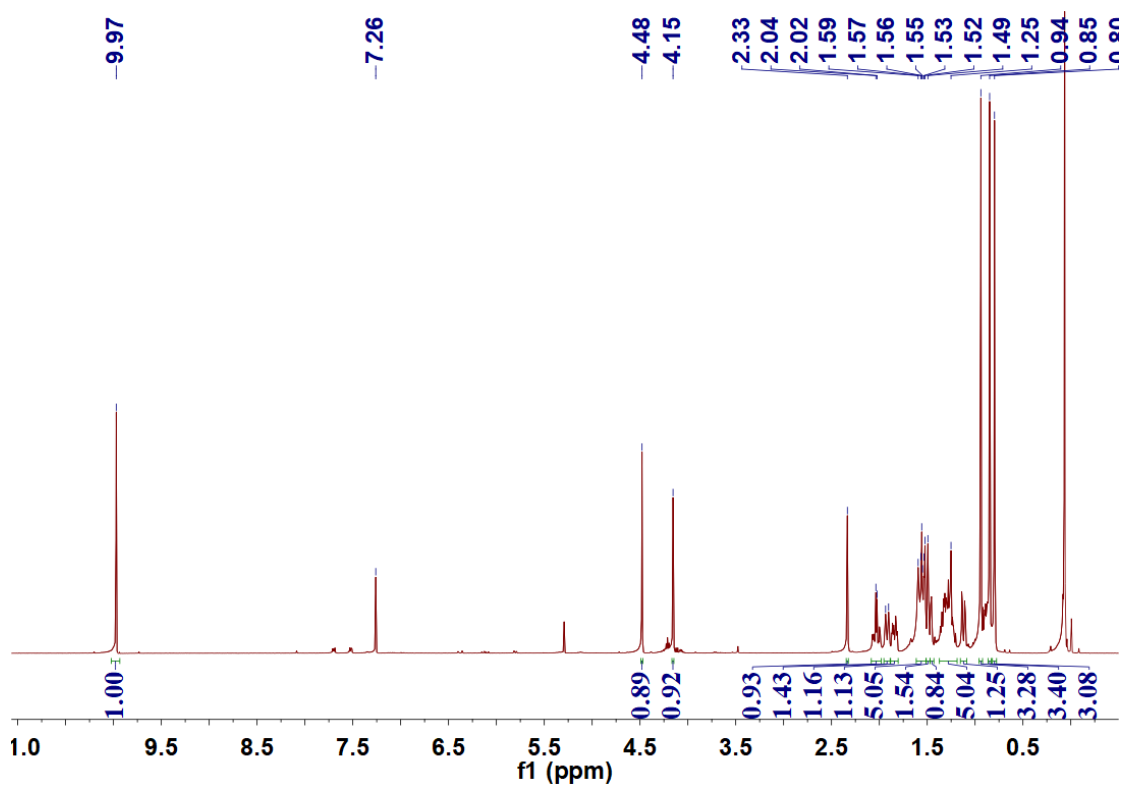

Figure S9.  $^1\text{H}$  NMR spectrum of **2** in  $\text{CDCl}_3$

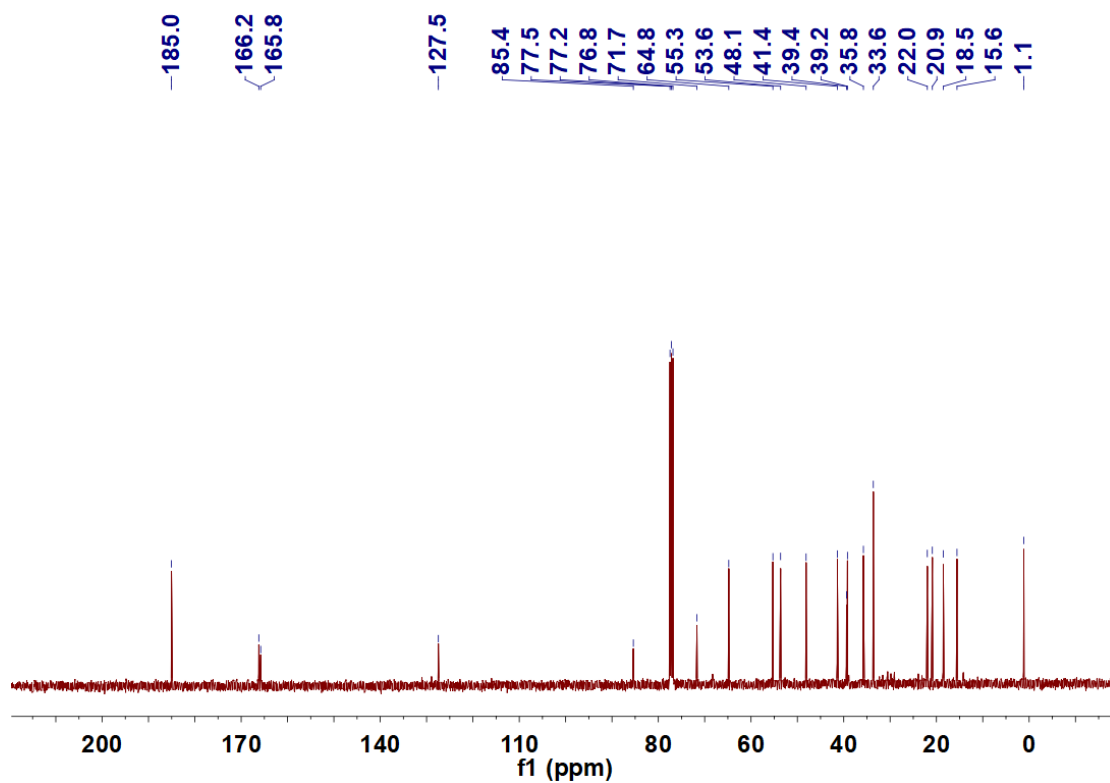

Figure S10.  $^{13}\text{C}$  NMR spectrum of **2** in  $\text{CDCl}_3$

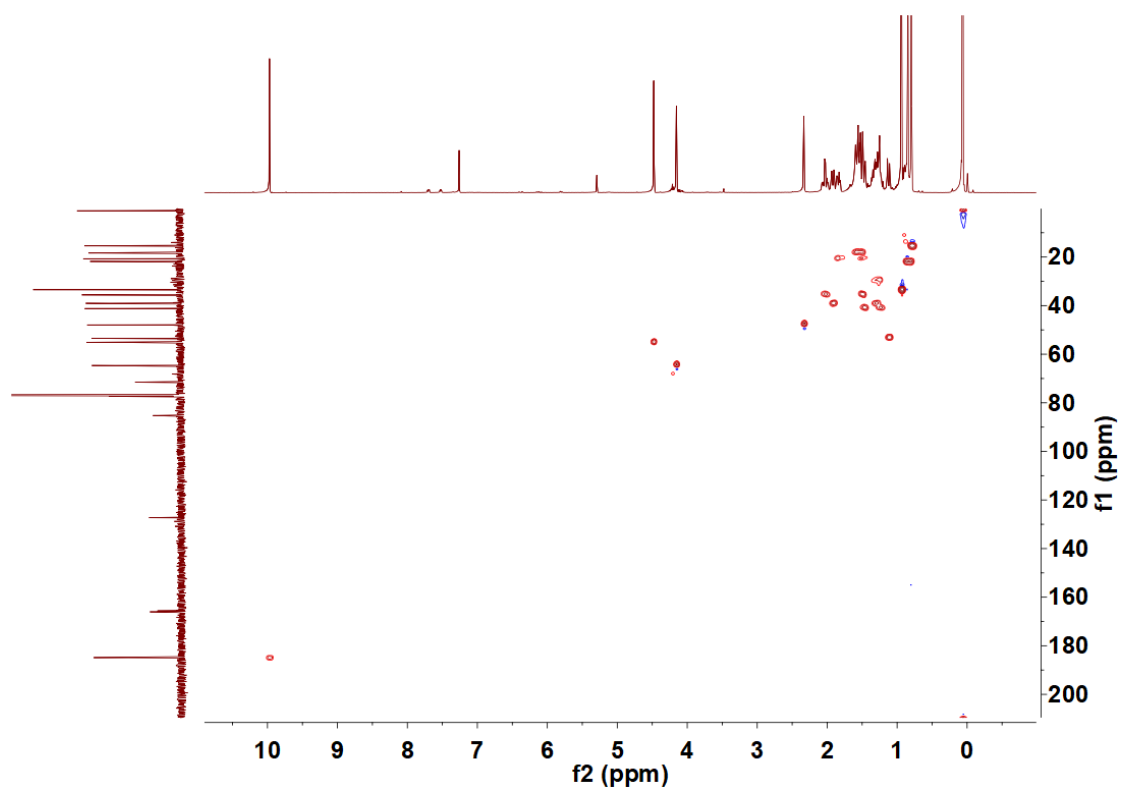

Figure S11. HSQC spectrum of **2** in  $\text{CDCl}_3$



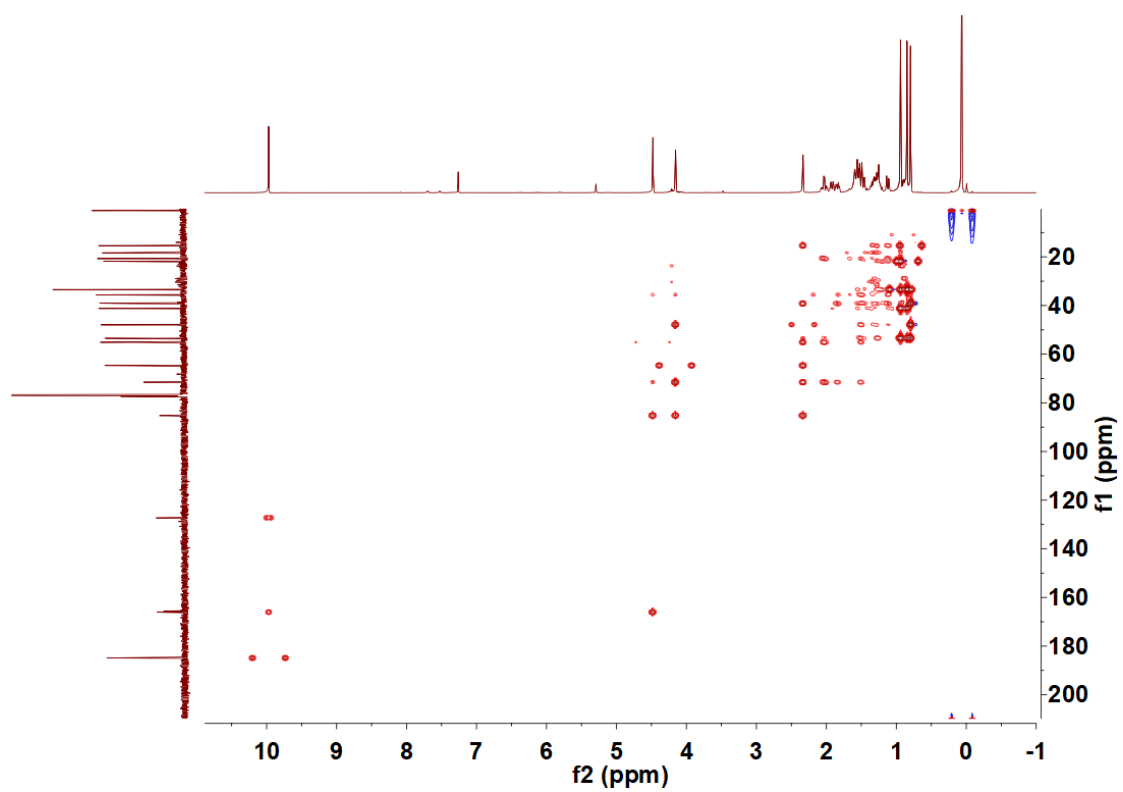

Figure S12. HMBC spectrum of **2** in  $\text{CDCl}_3$

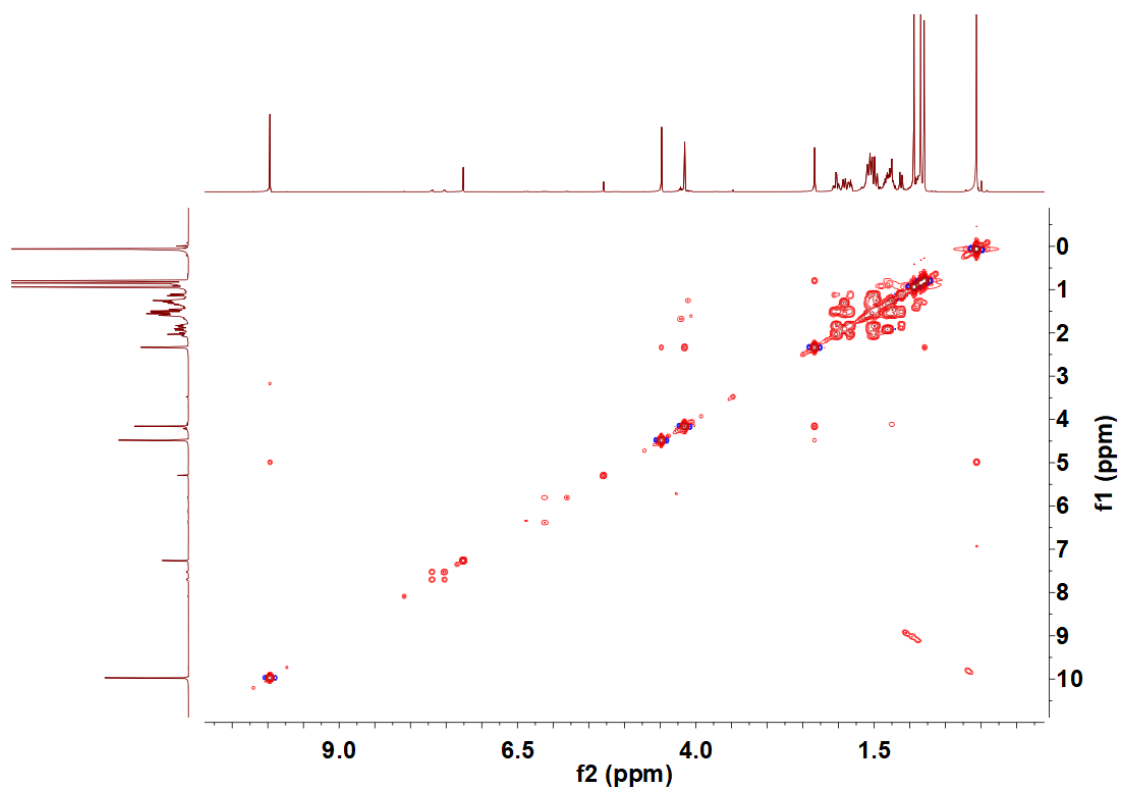

Figure S13.  $^1\text{H}$ - $^1\text{H}$  COSY spectrum of **2** in  $\text{CDCl}_3$

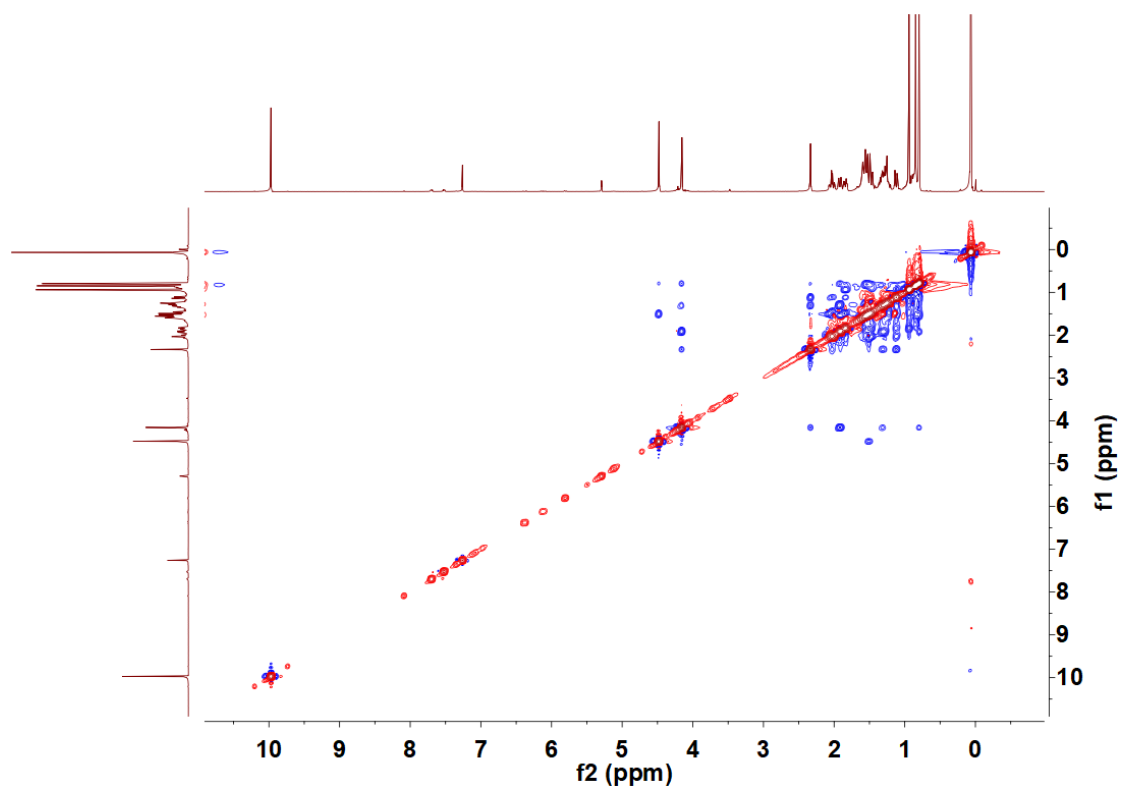

**Figure S14.** NOESY spectrum of **2** in CDCl<sub>3</sub>

| Elmt | Val. | Min | Max | Use Adduct |
|------|------|-----|-----|------|------|-----|-----|------|------|-----|-----|------|------|-----|-----|------------|
| H    | 1    | 0   | 24  | N    | 3    | 0   | 0   | P    | 3    | 0   | 0   | K    | 1    | 0   | 0   | H          |
| B    | 3    | 0   | 0   | O    | 2    | 0   | 5   | S    | 2    | 0   | 0   | Br   | 1    | 0   | 0   | HCOO       |
| C    | 4    | 0   | 20  | F    | 1    | 0   | 0   | Cl   | 1    | 0   | 0   | I    | 3    | 0   | 0   | CH3COO     |

Error Margin (ppm): 20

HC Ratio: unlimited

Max Isotopes: all

MSn Iso RI (%): 75.00

DBE Range: not fixed

Apply N Rule: no

Isotope RI (%): 1.00

MSn Logic Mode: AND

Electron Ions: both

Use MSn Info: no

Isotope Res: 10000

Max Results: 100

Event#: 2 MS(E-) Ret. Time : 1.093 Scan#: 166

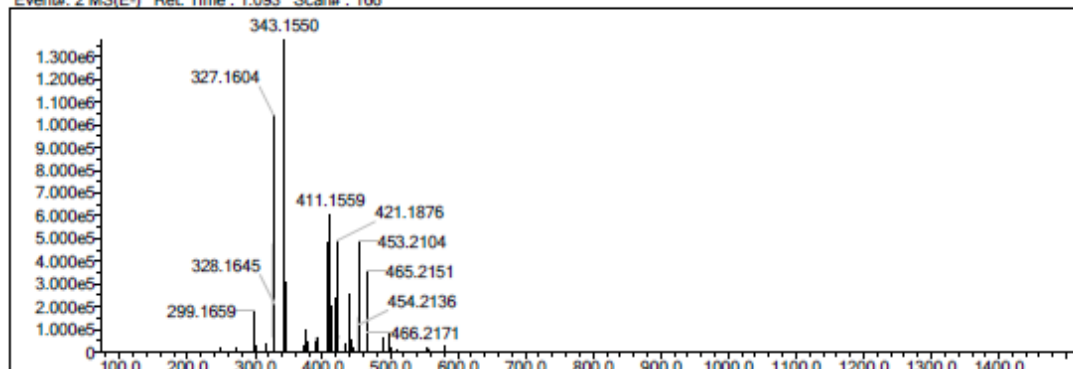

Measured region for 343.1550 m/z

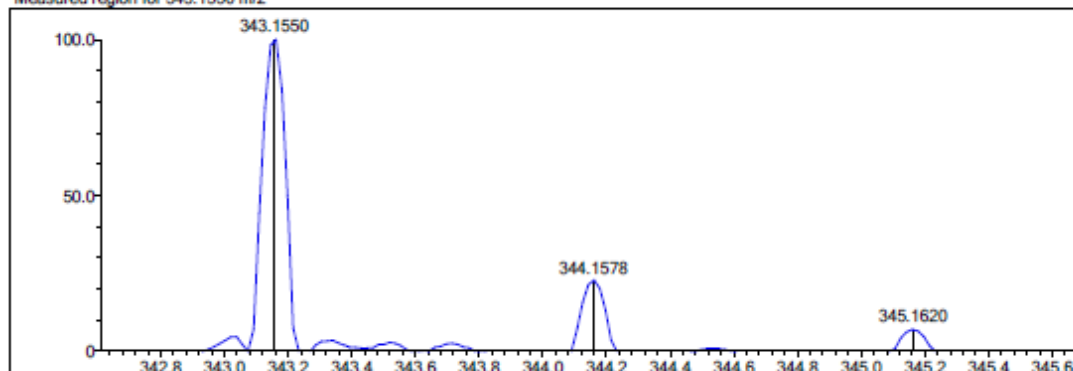

C20 H24 O5 [M-H]- : Predicted region for 343.1551 m/z

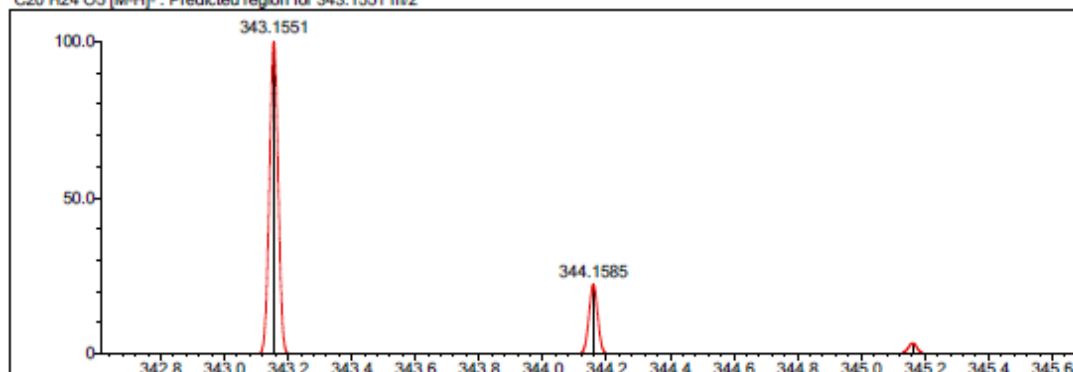

| Rank | Score | Formula (M) | Ion    | Meas. m/z | Pred. m/z | Df. (mDa) | Df. (ppm) | Iso   | DBE |
|------|-------|-------------|--------|-----------|-----------|-----------|-----------|-------|-----|
| 1    | 73.37 | C20 H24 O5  | [M-H]- | 343.1550  | 343.1551  | -0.1      | -0.29     | 73.37 | 9.0 |

Figure S15. HRESIMS spectrum of 2

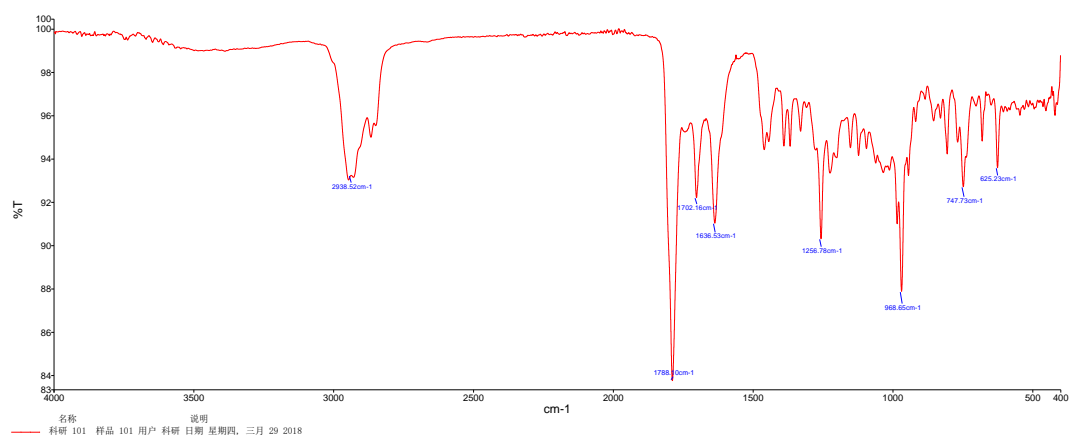

**Figure S16.** IR spectrum of **2**

## NMR and ECD calculation method of compound 1

### Calculation details

The random conformational searches were performed by SYBYL X 2.1.1 program using MMFF94s molecular force field. The obtained conformers were subsequently optimized by using Gaussian09 software at the B3LYP/6–31G(d) level in gas phase. The optimized stable conformers were selected for further NMR calculations at the mPW1PW91/6–311+G(d,p) level in chloroform and ECD calculations at the cam-B3LYP/6–31+G(d) level in acetonitrile. The overall theoretical NMR data were analyzed by using linear regression and DP4+ probability. The overall ECD data were weighted by Boltzmann distribution and produced by SpecDis 1.70.1 software.

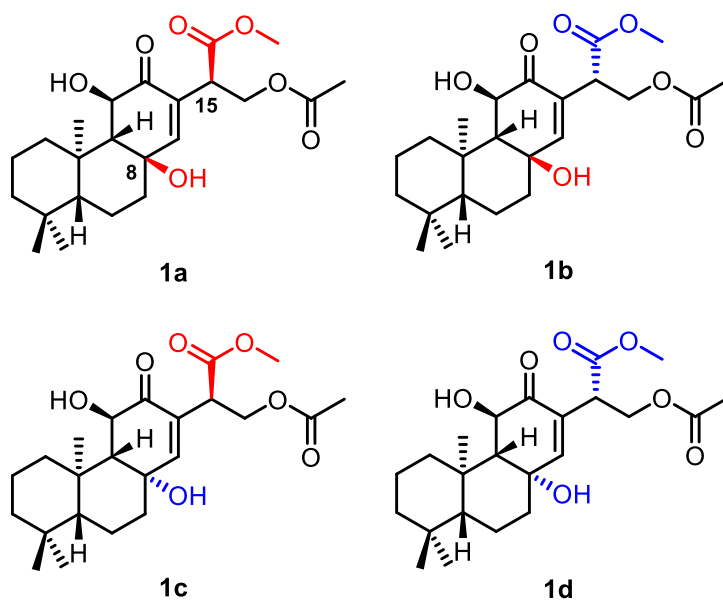

Figure S17. Structures of isomers 1a–1d

Table S1. Conformers and Boltzmann distributions of the optimized 1a

| Compound | conformer | Energy (Hartree) | Energy (kcal/mol) | Population (%) |
|----------|-----------|------------------|-------------------|----------------|
| 1a       | 1a-1      | -1423.276303     | -893119.357       | 13.03          |
| 1a       | 1a-2      | -1423.277675     | -893120.2178      | 55.7           |
| 1a       | 1a-3      | -1423.277095     | -893119.8539      | 30.14          |
| 1a       | 1a-4      | -1423.274004     | -893117.9143      | 1.14           |

**Table S2.** Cartesian coordinates of optimized **1a**

| Conformer | <b>1a-1</b> |        |                         |           |           |
|-----------|-------------|--------|-------------------------|-----------|-----------|
| Center    | Atomic      | Atomic | Coordinates (Angstroms) |           |           |
| Number    | Number      | Type   | X                       | Y         | Z         |
| 1         | 6           | 0      | -4.345374               | 1.533376  | 1.333837  |
| 2         | 1           | 0      | -4.896174               | 1.822110  | 2.238229  |
| 3         | 1           | 0      | -4.083907               | 2.472750  | 0.830843  |
| 4         | 6           | 0      | -5.243453               | 0.678631  | 0.437150  |
| 5         | 1           | 0      | -6.143724               | 1.239823  | 0.151486  |
| 6         | 1           | 0      | -5.593610               | -0.185137 | 1.022477  |
| 7         | 6           | 0      | -4.545695               | 0.149960  | -0.841679 |
| 8         | 6           | 0      | -3.189436               | -0.526991 | -0.429417 |
| 9         | 6           | 0      | -2.235996               | 0.280756  | 0.526993  |
| 10        | 6           | 0      | -3.076952               | 0.771210  | 1.739642  |
| 11        | 1           | 0      | -3.374205               | -0.099506 | 2.342886  |
| 12        | 1           | 0      | -2.469932               | 1.409682  | 2.392735  |
| 13        | 6           | 0      | -2.393306               | -1.130289 | -1.601165 |
| 14        | 1           | 0      | -3.062256               | -1.635163 | -2.305236 |
| 15        | 1           | 0      | -1.884792               | -0.346077 | -2.175473 |
| 16        | 6           | 0      | -1.388095               | -2.156514 | -1.073965 |
| 17        | 1           | 0      | -0.802995               | -2.602189 | -1.888455 |
| 18        | 1           | 0      | -1.931314               | -2.979868 | -0.595000 |
| 19        | 6           | 0      | -0.425493               | -1.601972 | -0.018188 |
| 20        | 6           | 0      | -1.158783               | -0.747464 | 1.058464  |
| 21        | 1           | 0      | -1.711927               | -1.473555 | 1.668664  |
| 22        | 6           | 0      | -5.477308               | -0.926443 | -1.448416 |
| 23        | 1           | 0      | -5.544696               | -1.810642 | -0.802658 |
| 24        | 1           | 0      | -5.148421               | -1.255705 | -2.439733 |
| 25        | 1           | 0      | -6.490154               | -0.521392 | -1.563267 |
| 26        | 6           | 0      | -4.414490               | 1.275319  | -1.891452 |
| 27        | 1           | 0      | -3.947588               | 2.182036  | -1.501038 |
| 28        | 1           | 0      | -5.410678               | 1.556878  | -2.254494 |
| 29        | 1           | 0      | -3.831861               | 0.950005  | -2.760596 |
| 30        | 6           | 0      | -1.570171               | 1.507872  | -0.135572 |
| 31        | 1           | 0      | -1.011631               | 1.268665  | -1.041728 |
| 32        | 1           | 0      | -0.861211               | 1.989036  | 0.546898  |
| 33        | 1           | 0      | -2.305561               | 2.270317  | -0.394854 |
| 34        | 6           | 0      | 0.740703                | -0.862009 | -0.645665 |
| 35        | 1           | 0      | 1.063066                | -1.230631 | -1.619523 |
| 36        | 6           | 0      | 1.474351                | 0.085445  | -0.032624 |
| 37        | 6           | 0      | 1.106679                | 0.517456  | 1.326287  |
| 38        | 6           | 0      | -0.118302               | -0.118705 | 2.000556  |

|           |             |        |                         |           |           |          |
|-----------|-------------|--------|-------------------------|-----------|-----------|----------|
| 39        | 1           | 0      |                         | -0.564560 | 0.645580  | 2.644596 |
| 40        | 8           | 0      | 0.406155                | -1.181368 | 2.832868  |          |
| 41        | 1           | 0      | 1.117421                | -0.791957 | 3.370623  |          |
| 42        | 8           | 0      | 1.811170                | 1.274419  | 1.988966  |          |
| 43        | 1           | 0      | -3.511744               | -1.386345 | 0.182928  |          |
| 44        | 8           | 0      | 0.158205                | -2.777033 | 0.593102  |          |
| 45        | 1           | 0      | 0.545971                | -2.484049 | 1.441932  |          |
| 46        | 6           | 0      | 2.751222                | 0.639411  | -0.628644 |          |
| 47        | 1           | 0      | 2.805800                | 0.304922  | -1.671206 |          |
| 48        | 6           | 0      | 4.016406                | 0.105482  | 0.086071  |          |
| 49        | 1           | 0      | 4.145229                | 0.585693  | 1.054119  |          |
| 50        | 1           | 0      | 4.896527                | 0.272976  | -0.536733 |          |
| 51        | 6           | 0      | 2.705137                | 2.164845  | -0.684403 |          |
| 52        | 8           | 0      | 1.697200                | 2.813930  | -0.857824 |          |
| 53        | 8           | 0      | 3.935819                | 2.706906  | -0.583212 |          |
| 54        | 6           | 0      | 3.985900                | 4.142603  | -0.659202 |          |
| 55        | 1           | 0      | 3.404936                | 4.585529  | 0.153489  |          |
| 56        | 1           | 0      | 3.585981                | 4.488890  | -1.615581 |          |
| 57        | 1           | 0      | 5.040564                | 4.402402  | -0.565629 |          |
| 58        | 8           | 0      | 3.897984                | -1.299009 | 0.392161  |          |
| 59        | 6           | 0      | 3.945621                | -2.161349 | -0.652814 |          |
| 60        | 6           | 0      | 3.666139                | -3.571413 | -0.197777 |          |
| 61        | 1           | 0      | 2.588122                | -3.663511 | -0.013384 |          |
| 62        | 1           | 0      | 4.188613                | -3.795162 | 0.736347  |          |
| 63        | 1           | 0      | 3.960957                | -4.273356 | -0.979021 |          |
| 64        | 8           | 0      | 4.141457                | -1.813889 | -1.798902 |          |
| Conformer | <b>1a-2</b> |        |                         |           |           |          |
| Center    | Atomic      | Atomic | Coordinates (Angstroms) |           |           |          |
| Number    | Number      | Type   | X                       | Y         | Z         |          |
| 1         | 6           | 0      | -4.125317               | 1.018796  | 1.951837  |          |
| 2         | 1           | 0      | -4.574715               | 1.022851  | 2.953209  |          |
| 3         | 1           | 0      | -3.902181               | 2.067720  | 1.720149  |          |
| 4         | 6           | 0      | -5.125270               | 0.446935  | 0.944034  |          |
| 5         | 1           | 0      | -6.043125               | 1.050813  | 0.929868  |          |
| 6         | 1           | 0      | -5.423449               | -0.555536 | 1.286357  |          |
| 7         | 6           | 0      | -4.574786               | 0.324790  | -0.499323 |          |
| 8         | 6           | 0      | -3.188303               | -0.413056 | -0.448931 |          |
| 9         | 6           | 0      | -2.131072               | 0.095143  | 0.599042  |          |
| 10        | 6           | 0      | -2.833617               | 0.191658  | 1.982406  |          |
| 11        | 1           | 0      | -3.079567               | -0.823366 | 2.328596  |          |
| 12        | 1           | 0      | -2.150167               | 0.616939  | 2.726817  |          |
| 13        | 6           | 0      | -2.523711               | -0.619530 | -1.821967 |          |

|    |   |   |           |           |           |
|----|---|---|-----------|-----------|-----------|
| 14 | 1 | 0 | -3.267512 | -0.894929 | -2.576588 |
| 15 | 1 | 0 | -2.060467 | 0.309547  | -2.176471 |
| 16 | 6 | 0 | -1.491229 | -1.745220 | -1.732012 |
| 17 | 1 | 0 | -0.999067 | -1.918615 | -2.697804 |
| 18 | 1 | 0 | -2.002288 | -2.680648 | -1.474150 |
| 19 | 6 | 0 | -0.418105 | -1.536121 | -0.656412 |
| 20 | 6 | 0 | -1.014137 | -1.019573 | 0.692822  |
| 21 | 1 | 0 | -1.505668 | -1.897578 | 1.132758  |
| 22 | 6 | 0 | -5.575942 | -0.552076 | -1.289376 |
| 23 | 1 | 0 | -5.579863 | -1.586589 | -0.924614 |
| 24 | 1 | 0 | -5.359064 | -0.572913 | -2.362715 |
| 25 | 1 | 0 | -6.591988 | -0.155267 | -1.173872 |
| 26 | 6 | 0 | -4.550826 | 1.708191  | -1.187108 |
| 27 | 1 | 0 | -5.578869 | 2.045702  | -1.368305 |
| 28 | 1 | 0 | -4.045386 | 1.668996  | -2.158393 |
| 29 | 1 | 0 | -4.061906 | 2.481957  | -0.591086 |
| 30 | 6 | 0 | -1.531689 | 1.478555  | 0.256348  |
| 31 | 1 | 0 | -0.802900 | 1.785877  | 1.013240  |
| 32 | 1 | 0 | -2.297037 | 2.254923  | 0.242557  |
| 33 | 1 | 0 | -1.017732 | 1.511426  | -0.705868 |
| 34 | 6 | 0 | 0.726251  | -0.674049 | -1.157770 |
| 35 | 1 | 0 | 0.978951  | -0.807076 | -2.209935 |
| 36 | 6 | 0 | 1.499253  | 0.118398  | -0.393736 |
| 37 | 6 | 0 | 1.194097  | 0.273393  | 1.044013  |
| 38 | 6 | 0 | 0.146746  | -0.670889 | 1.649347  |
| 39 | 1 | 0 | -0.209155 | -0.204147 | 2.572886  |
| 40 | 8 | 0 | 0.802981  | -1.915579 | 1.982174  |
| 41 | 1 | 0 | 1.756047  | -1.766373 | 2.137780  |
| 42 | 8 | 0 | 1.807497  | 1.059566  | 1.755877  |
| 43 | 1 | 0 | -3.452732 | -1.422676 | -0.091680 |
| 44 | 8 | 0 | 0.171291  | -2.844629 | -0.467393 |
| 45 | 1 | 0 | 0.581630  | -2.810219 | 0.424072  |
| 46 | 6 | 0 | 2.724261  | 0.838023  | -0.922555 |
| 47 | 1 | 0 | 2.735542  | 0.717055  | -2.014224 |
| 48 | 6 | 0 | 4.034801  | 0.236697  | -0.378490 |
| 49 | 1 | 0 | 4.086321  | 0.302429  | 0.707085  |
| 50 | 1 | 0 | 4.898673  | 0.729544  | -0.823780 |
| 51 | 6 | 0 | 2.600043  | 2.345473  | -0.680283 |
| 52 | 8 | 0 | 1.578004  | 2.971518  | -0.851056 |
| 53 | 8 | 0 | 3.772452  | 2.903624  | -0.321039 |
| 54 | 6 | 0 | 3.727568  | 4.319845  | -0.070098 |
| 55 | 1 | 0 | 4.745439  | 4.599421  | 0.202387  |



| 56        | 1           | 0      | 3.035669                | 4.534288  | 0.747846  |
|-----------|-------------|--------|-------------------------|-----------|-----------|
| 57        | 1           | 0      | 3.404376                | 4.857036  | −0.965296 |
| 58        | 8           | 0      | 4.119303                | −1.147465 | −0.794449 |
| 59        | 6           | 0      | 3.785962                | −2.097702 | 0.101484  |
| 60        | 6           | 0      | 3.730645                | −3.460339 | −0.536969 |
| 61        | 1           | 0      | 2.705157                | −3.609956 | −0.899283 |
| 62        | 1           | 0      | 3.950220                | −4.225835 | 0.209625  |
| 63        | 1           | 0      | 4.414781                | −3.536661 | −1.384531 |
| 64        | 8           | 0      | 3.523257                | −1.868560 | 1.269081  |
| Conformer | <b>1a–3</b> |        |                         |           |           |
| Center    | Atomic      | Atomic | Coordinates (Angstroms) |           |           |
| Number    | Number      | Type   | X                       | Y         | Z         |
| 1         | 6           | 0      | −4.352255               | 1.239346  | 1.383404  |
| 2         | 1           | 0      | −4.921521               | 1.474582  | 2.291801  |
| 3         | 1           | 0      | −4.153214               | 2.203422  | 0.899101  |
| 4         | 6           | 0      | −5.191886               | 0.343829  | 0.469883  |
| 5         | 1           | 0      | −6.125029               | 0.851570  | 0.190044  |
| 6         | 1           | 0      | −5.488712               | −0.549096 | 1.040387  |
| 7         | 6           | 0      | −4.459092               | −0.119952 | −0.814456 |
| 8         | 6           | 0      | −3.061551               | −0.712481 | −0.408938 |
| 9         | 6           | 0      | −2.164459               | 0.142985  | 0.559385  |
| 10        | 6           | 0      | −3.036291               | 0.556245  | 1.778462  |
| 11        | 1           | 0      | −3.274435               | −0.343715 | 2.364419  |
| 12        | 1           | 0      | −2.473446               | 1.221089  | 2.444535  |
| 13        | 6           | 0      | −2.227494               | −1.246917 | −1.586684 |
| 14        | 1           | 0      | −2.862497               | −1.783571 | −2.298462 |
| 15        | 1           | 0      | −1.769829               | −0.424401 | −2.150167 |
| 16        | 6           | 0      | −1.158620               | −2.212340 | −1.072513 |
| 17        | 1           | 0      | −0.548192               | −2.611542 | −1.892326 |
| 18        | 1           | 0      | −1.647054               | −3.073791 | −0.601170 |
| 19        | 6           | 0      | −0.230621               | −1.608934 | −0.011781 |
| 20        | 6           | 0      | −1.013956               | −0.812478 | 1.075235  |
| 21        | 1           | 0      | −1.510281               | −1.579559 | 1.684040  |
| 22        | 6           | 0      | −5.317203               | −1.246268 | −1.438750 |
| 23        | 1           | 0      | −5.325613               | −2.143199 | −0.807255 |
| 24        | 1           | 0      | −4.967975               | −1.537280 | −2.435035 |
| 25        | 1           | 0      | −6.354650               | −0.907559 | −1.547852 |
| 26        | 6           | 0      | −4.400440               | 1.026984  | −1.847774 |
| 27        | 1           | 0      | −5.410057               | 1.236746  | −2.222073 |
| 28        | 1           | 0      | −3.782239               | 0.761185  | −2.712462 |
| 29        | 1           | 0      | −4.011442               | 1.961730  | −1.437496 |
| 30        | 6           | 0      | −1.585967               | 1.422072  | −0.087788 |

| 31        | 1           | 0      | -2.372320               | 2.132529  | -0.345109 |
|-----------|-------------|--------|-------------------------|-----------|-----------|
| 32        | 1           | 0      | -1.008286               | 1.228810  | -0.993506 |
| 33        | 1           | 0      | -0.918056               | 1.943257  | 0.607258  |
| 34        | 6           | 0      | 0.891302                | -0.797547 | -0.631649 |
| 35        | 1           | 0      | 1.246324                | -1.153047 | -1.598961 |
| 36        | 6           | 0      | 1.559939                | 0.198264  | -0.018572 |
| 37        | 6           | 0      | 1.145018                | 0.624046  | 1.328818  |
| 38        | 6           | 0      | -0.013155               | -0.117399 | 2.013644  |
| 39        | 1           | 0      | -0.509156               | 0.599351  | 2.675795  |
| 40        | 8           | 0      | 0.605911                | -1.147466 | 2.820277  |
| 41        | 1           | 0      | 1.285446                | -0.713508 | 3.364625  |
| 42        | 8           | 0      | 1.763491                | 1.469421  | 1.969523  |
| 43        | 1           | 0      | -3.327349               | -1.598980 | 0.191588  |
| 44        | 8           | 0      | 0.423696                | -2.752516 | 0.586502  |
| 45        | 1           | 0      | 0.816405                | -2.438710 | 1.425413  |
| 46        | 6           | 0      | 2.815078                | 0.810622  | -0.604670 |
| 47        | 1           | 0      | 2.868662                | 0.509994  | -1.657165 |
| 48        | 6           | 0      | 4.101465                | 0.304294  | 0.089227  |
| 49        | 1           | 0      | 4.214059                | 0.767471  | 1.068046  |
| 50        | 1           | 0      | 4.969601                | 0.536350  | -0.529846 |
| 51        | 6           | 0      | 2.833791                | 2.335617  | -0.594244 |
| 52        | 8           | 0      | 3.821201                | 3.008046  | -0.395321 |
| 53        | 8           | 0      | 1.626236                | 2.851055  | -0.908697 |
| 54        | 6           | 0      | 1.566297                | 4.287761  | -0.942071 |
| 55        | 1           | 0      | 1.817427                | 4.700507  | 0.038212  |
| 56        | 1           | 0      | 0.537781                | 4.530403  | -1.210377 |
| 57        | 1           | 0      | 2.262672                | 4.683542  | -1.685852 |
| 58        | 8           | 0      | 4.051212                | -1.111253 | 0.355005  |
| 59        | 6           | 0      | 4.124782                | -1.941788 | -0.713185 |
| 60        | 6           | 0      | 3.941841                | -3.377693 | -0.290190 |
| 61        | 1           | 0      | 2.877260                | -3.539679 | -0.078857 |
| 62        | 1           | 0      | 4.504048                | -3.594097 | 0.622338  |
| 63        | 1           | 0      | 4.255197                | -4.039558 | -1.098717 |
| 64        | 8           | 0      | 4.271669                | -1.554894 | -1.854001 |
| conformer | <b>1a-4</b> |        |                         |           |           |
| Center    | Atomic      | Atomic | Coordinates (Angstroms) |           |           |
| Number    | Number      | Type   | X                       | Y         | Z         |
| 1         | 6           | 0      | 4.545889                | -1.417735 | -1.489097 |
| 2         | 1           | 0      | 5.144800                | -2.303273 | -1.737764 |
| 3         | 1           | 0      | 4.282721                | -0.956102 | -2.449363 |
| 4         | 6           | 0      | 5.380024                | -0.456166 | -0.639803 |
| 5         | 1           | 0      | 6.286040                | -0.151803 | -1.181687 |

|    |   |   |           |           |           |
|----|---|---|-----------|-----------|-----------|
| 6  | 1 | 0 | 5.724934  | -0.997344 | 0.254137  |
| 7  | 6 | 0 | 4.613669  | 0.809569  | -0.179696 |
| 8  | 6 | 0 | 3.248949  | 0.370586  | 0.466233  |
| 9  | 6 | 0 | 2.371087  | -0.672164 | -0.316911 |
| 10 | 6 | 0 | 3.281516  | -1.857444 | -0.740486 |
| 11 | 1 | 0 | 3.588957  | -2.408254 | 0.160767  |
| 12 | 1 | 0 | 2.719224  | -2.564943 | -1.360896 |
| 13 | 6 | 0 | 2.370438  | 1.534370  | 0.958960  |
| 14 | 1 | 0 | 2.982079  | 2.312108  | 1.428029  |
| 15 | 1 | 0 | 1.855272  | 2.018992  | 0.120766  |
| 16 | 6 | 0 | 1.370692  | 1.022354  | 1.997064  |
| 17 | 1 | 0 | 0.717221  | 1.827617  | 2.356264  |
| 18 | 1 | 0 | 1.924910  | 0.664226  | 2.872941  |
| 19 | 6 | 0 | 0.502886  | -0.162655 | 1.543742  |
| 20 | 6 | 0 | 1.297115  | -1.220131 | 0.706506  |
| 21 | 1 | 0 | 1.863837  | -1.786922 | 1.456705  |
| 22 | 6 | 0 | 5.478893  | 1.490924  | 0.907513  |
| 23 | 1 | 0 | 5.545232  | 0.875725  | 1.813199  |
| 24 | 1 | 0 | 5.093142  | 2.474829  | 1.195309  |
| 25 | 1 | 0 | 6.498872  | 1.641898  | 0.533211  |
| 26 | 6 | 0 | 4.490000  | 1.812865  | -1.348520 |
| 27 | 1 | 0 | 5.477652  | 2.231149  | -1.578812 |
| 28 | 1 | 0 | 3.832246  | 2.652080  | -1.096679 |
| 29 | 1 | 0 | 4.115177  | 1.360939  | -2.269916 |
| 30 | 6 | 0 | 1.706129  | -0.081763 | -1.582326 |
| 31 | 1 | 0 | 1.165265  | -0.856270 | -2.134146 |
| 32 | 1 | 0 | 2.444868  | 0.329577  | -2.270490 |
| 33 | 1 | 0 | 0.993807  | 0.715725  | -1.355718 |
| 34 | 6 | 0 | -0.797903 | 0.281436  | 0.892178  |
| 35 | 1 | 0 | -1.265257 | 1.134578  | 1.379683  |
| 36 | 6 | 0 | -1.452091 | -0.380646 | -0.078016 |
| 37 | 6 | 0 | -0.802757 | -1.541022 | -0.730083 |
| 38 | 6 | 0 | 0.296026  | -2.218271 | 0.086410  |
| 39 | 1 | 0 | 0.790642  | -2.954629 | -0.553674 |
| 40 | 8 | 0 | -0.371656 | -2.912635 | 1.169640  |
| 41 | 1 | 0 | -1.302965 | -3.064807 | 0.918967  |
| 42 | 8 | 0 | -1.194591 | -2.003146 | -1.793331 |
| 43 | 1 | 0 | 3.562038  | -0.171601 | 1.374103  |
| 44 | 8 | 0 | 0.059654  | -0.760435 | 2.779122  |
| 45 | 1 | 0 | -0.317368 | -1.626863 | 2.519820  |
| 46 | 6 | 0 | -2.868010 | -0.119507 | -0.543126 |
| 47 | 1 | 0 | -2.876679 | -0.079183 | -1.639846 |

|    |   |   |           |           |           |
|----|---|---|-----------|-----------|-----------|
| 48 | 6 | 0 | -3.528069 | 1.157378  | -0.019485 |
| 49 | 1 | 0 | -3.529301 | 1.201509  | 1.074893  |
| 50 | 1 | 0 | -4.563590 | 1.221019  | -0.358021 |
| 51 | 6 | 0 | -3.721974 | -1.344369 | -0.169688 |
| 52 | 8 | 0 | -3.333024 | -2.315775 | 0.450450  |
| 53 | 8 | 0 | -4.978497 | -1.218443 | -0.622898 |
| 54 | 6 | 0 | -5.860887 | -2.324765 | -0.347877 |
| 55 | 1 | 0 | -5.950413 | -2.481301 | 0.729702  |
| 56 | 1 | 0 | -5.479646 | -3.235952 | -0.814809 |
| 57 | 1 | 0 | -6.821098 | -2.042015 | -0.778638 |
| 58 | 8 | 0 | -2.782494 | 2.273274  | -0.543303 |
| 59 | 6 | 0 | -3.286107 | 3.500257  | -0.250379 |
| 60 | 6 | 0 | -2.430011 | 4.587798  | -0.854079 |
| 61 | 1 | 0 | -1.412993 | 4.532644  | -0.451755 |
| 62 | 1 | 0 | -2.865941 | 5.560614  | -0.625038 |
| 63 | 1 | 0 | -2.359454 | 4.455188  | -1.938492 |
| 64 | 8 | 0 | -4.286548 | 3.667842  | 0.409448  |

**Table S3.** Conformers and Boltzmann distributions of the optimized **1b**

| Compound  | conformer   | Energy<br>(Hartree) | Energy<br>(kcal/mol) | Population<br>(%) |
|-----------|-------------|---------------------|----------------------|-------------------|
| <b>1b</b> | <b>1b-1</b> | -1423.272546        | -893116.9993         | 0.78              |
| <b>1b</b> | <b>1b-2</b> | -1423.276172        | -893119.275          | 36.12             |
| <b>1b</b> | <b>1b-3</b> | -1423.276211        | -893119.2995         | 37.65             |
| <b>1b</b> | <b>1b-4</b> | -1423.275842        | -893119.0677         | 25.46             |

**Table S4.** Cartesian coordinates of optimized **1b**

| Conformer | <b>1b-1</b> |        |                         |           |           |
|-----------|-------------|--------|-------------------------|-----------|-----------|
| Center    | Atomic      | Atomic | Coordinates (Angstroms) |           |           |
| Number    | Number      | Type   | X                       | Y         | Z         |
| 1         | 6           | 0      | 4.558397                | -0.500172 | -2.084334 |
| 2         | 1           | 0      | 5.120518                | -1.204131 | -2.711302 |
| 3         | 1           | 0      | 4.186266                | 0.276045  | -2.764842 |
| 4         | 6           | 0      | 5.489818                | 0.108001  | -1.033078 |
| 5         | 1           | 0      | 6.326352                | 0.630486  | -1.517233 |
| 6         | 1           | 0      | 5.935843                | -0.713500 | -0.452477 |
| 7         | 6           | 0      | 4.787365                | 1.077333  | -0.048232 |
| 8         | 6           | 0      | 3.502085                | 0.377410  | 0.527053  |
| 9         | 6           | 0      | 2.535936                | -0.329199 | -0.492685 |
| 10        | 6           | 0      | 3.387555                | -1.237144 | -1.422030 |

|    |   |   |           |           |           |
|----|---|---|-----------|-----------|-----------|
| 11 | 1 | 0 | 3.793995  | -2.069775 | -0.828602 |
| 12 | 1 | 0 | 2.756468  | -1.687388 | -2.197622 |
| 13 | 6 | 0 | 2.689848  | 1.241082  | 1.509164  |
| 14 | 1 | 0 | 3.353588  | 1.810590  | 2.167759  |
| 15 | 1 | 0 | 2.086990  | 1.982401  | 0.971346  |
| 16 | 6 | 0 | 1.807116  | 0.345838  | 2.379097  |
| 17 | 1 | 0 | 1.201814  | 0.937284  | 3.077693  |
| 18 | 1 | 0 | 2.450389  | -0.294068 | 2.994920  |
| 19 | 6 | 0 | 0.888210  | -0.614209 | 1.607456  |
| 20 | 6 | 0 | 1.575833  | -1.254980 | 0.356770  |
| 21 | 1 | 0 | 2.215179  | -2.043630 | 0.775028  |
| 22 | 6 | 0 | 4.536877  | 2.442232  | -0.728128 |
| 23 | 1 | 0 | 3.927360  | 3.101959  | -0.100917 |
| 24 | 1 | 0 | 4.044485  | 2.359280  | -1.700114 |
| 25 | 1 | 0 | 5.495262  | 2.948044  | -0.898764 |
| 26 | 6 | 0 | 5.773909  | 1.329593  | 1.117065  |
| 27 | 1 | 0 | 5.938185  | 0.419674  | 1.707100  |
| 28 | 1 | 0 | 5.428045  | 2.115062  | 1.797712  |
| 29 | 1 | 0 | 6.745648  | 1.650051  | 0.721719  |
| 30 | 6 | 0 | 1.743987  | 0.668350  | -1.369907 |
| 31 | 1 | 0 | 2.409527  | 1.321434  | -1.934547 |
| 32 | 1 | 0 | 1.077165  | 1.312021  | -0.789908 |
| 33 | 1 | 0 | 1.132202  | 0.137907  | -2.105026 |
| 34 | 6 | 0 | -0.475980 | -0.013784 | 1.309967  |
| 35 | 1 | 0 | -0.903756 | 0.555794  | 2.134793  |
| 36 | 6 | 0 | -1.235732 | -0.280685 | 0.231286  |
| 37 | 6 | 0 | -0.668607 | -1.083628 | -0.874689 |
| 38 | 6 | 0 | 0.502306  | -1.982632 | -0.483160 |
| 39 | 1 | 0 | 0.919162  | -2.414265 | -1.397692 |
| 40 | 8 | 0 | -0.057007 | -3.047842 | 0.324687  |
| 41 | 1 | 0 | -1.013253 | -3.114754 | 0.135633  |
| 42 | 8 | 0 | -1.158901 | -1.121662 | -1.996200 |
| 43 | 1 | 0 | 3.911830  | -0.453032 | 1.125770  |
| 44 | 8 | 0 | 0.578404  | -1.645413 | 2.567919  |
| 45 | 1 | 0 | 0.170167  | -2.365571 | 2.043575  |
| 46 | 6 | 0 | -2.698748 | 0.097287  | 0.134003  |
| 47 | 1 | 0 | -2.985290 | 0.618307  | 1.054321  |
| 48 | 6 | 0 | -2.980583 | 1.072789  | -1.035909 |
| 49 | 1 | 0 | -2.934820 | 0.558965  | -1.993585 |
| 50 | 1 | 0 | -2.226084 | 1.862631  | -1.003732 |
| 51 | 6 | 0 | -3.518856 | -1.197131 | 0.077655  |
| 52 | 8 | 0 | -3.055986 | -2.323133 | 0.140471  |

| 53        | 8           | 0      | -4.834607               | -0.957036 | -0.008002 |
|-----------|-------------|--------|-------------------------|-----------|-----------|
| 54        | 6           | 0      | -5.681700               | -2.121423 | -0.054426 |
| 55        | 1           | 0      | -5.428022               | -2.742492 | -0.916725 |
| 56        | 1           | 0      | -6.697386               | -1.735939 | -0.142013 |
| 57        | 1           | 0      | -5.568799               | -2.711139 | 0.858732  |
| 58        | 8           | 0      | -4.287941               | 1.672250  | -0.980177 |
| 59        | 6           | 0      | -4.464146               | 2.659514  | -0.071391 |
| 60        | 6           | 0      | -5.871288               | 3.202502  | -0.138787 |
| 61        | 1           | 0      | -5.980826               | 4.020335  | 0.574079  |
| 62        | 1           | 0      | -6.586473               | 2.406658  | 0.094452  |
| 63        | 1           | 0      | -6.093655               | 3.554211  | -1.151289 |
| 64        | 8           | 0      | -3.597675               | 3.038945  | 0.688201  |
| Conformer | <b>1b-2</b> |        |                         |           |           |
| Center    | Atomic      | Atomic | Coordinates (Angstroms) |           |           |
| Number    | Number      | Type   | X                       | Y         | Z         |
| 1         | 6           | 0      | 4.073185                | -0.942270 | -2.142389 |
| 2         | 1           | 0      | 4.584701                | -1.674527 | -2.780136 |
| 3         | 1           | 0      | 3.717495                | -0.154339 | -2.818242 |
| 4         | 6           | 0      | 5.062698                | -0.371071 | -1.123535 |
| 5         | 1           | 0      | 5.903039                | 0.115967  | -1.637033 |
| 6         | 1           | 0      | 5.494061                | -1.209234 | -0.556017 |
| 7         | 6           | 0      | 4.435107                | 0.625960  | -0.116677 |
| 8         | 6           | 0      | 3.145743                | -0.025462 | 0.502211  |
| 9         | 6           | 0      | 2.110714                | -0.674248 | -0.487440 |
| 10        | 6           | 0      | 2.889899                | -1.622314 | -1.442482 |
| 11        | 1           | 0      | 3.274229                | -2.473462 | -0.860864 |
| 12        | 1           | 0      | 2.215115                | -2.042618 | -2.198034 |
| 13        | 6           | 0      | 2.417046                | 0.850446  | 1.537893  |
| 14        | 1           | 0      | 3.133544                | 1.376629  | 2.176737  |
| 15        | 1           | 0      | 1.822192                | 1.629219  | 1.043300  |
| 16        | 6           | 0      | 1.534081                | -0.027542 | 2.424822  |
| 17        | 1           | 0      | 1.002033                | 0.566608  | 3.178515  |
| 18        | 1           | 0      | 2.169088                | -0.729759 | 2.978297  |
| 19        | 6           | 0      | 0.517174                | -0.886771 | 1.661222  |
| 20        | 6           | 0      | 1.128589                | -1.554025 | 0.386746  |
| 21        | 1           | 0      | 1.732796                | -2.384155 | 0.775497  |
| 22        | 6           | 0      | 4.213901                | 2.000004  | -0.787524 |
| 23        | 1           | 0      | 5.184423                | 2.468270  | -0.992834 |
| 24        | 1           | 0      | 3.654387                | 2.682099  | -0.137700 |
| 25        | 1           | 0      | 3.683007                | 1.937890  | -1.740295 |
| 26        | 6           | 0      | 5.472832                | 0.839503  | 1.011809  |
| 27        | 1           | 0      | 5.187262                | 1.644402  | 1.697373  |

|           |             |        |                         |           |           |
|-----------|-------------|--------|-------------------------|-----------|-----------|
| 28        | 1           | 0      | 6.443205                | 1.113427  | 0.579910  |
| 29        | 1           | 0      | 5.617308                | -0.073218 | 1.602732  |
| 30        | 6           | 0      | 1.339671                | 0.356511  | -1.344248 |
| 31        | 1           | 0      | 0.657578                | -0.151514 | -2.034248 |
| 32        | 1           | 0      | 2.013512                | 0.949058  | -1.963251 |
| 33        | 1           | 0      | 0.739620                | 1.052957  | -0.755191 |
| 34        | 6           | 0      | -0.768107               | -0.130804 | 1.380756  |
| 35        | 1           | 0      | -1.089350               | 0.533068  | 2.183536  |
| 36        | 6           | 0      | -1.582828               | -0.326220 | 0.327930  |
| 37        | 6           | 0      | -1.186768               | -1.275893 | -0.729800 |
| 38        | 6           | 0      | -0.002972               | -2.202532 | -0.431560 |
| 39        | 1           | 0      | 0.356102                | -2.594658 | -1.388399 |
| 40        | 8           | 0      | -0.533632               | -3.293040 | 0.357016  |
| 41        | 1           | 0      | -1.381355               | -3.564842 | -0.035336 |
| 42        | 8           | 0      | -1.832961               | -1.424182 | -1.762282 |
| 43        | 1           | 0      | 3.544194                | -0.883930 | 1.068221  |
| 44        | 8           | 0      | 0.132369                | -1.898241 | 2.612161  |
| 45        | 1           | 0      | -0.381296               | -2.559447 | 2.106953  |
| 46        | 6           | 0      | -2.925880               | 0.355109  | 0.182789  |
| 47        | 1           | 0      | -3.142464               | 0.905256  | 1.107652  |
| 48        | 6           | 0      | -2.978178               | 1.380441  | -0.968788 |
| 49        | 1           | 0      | -3.941218               | 1.890444  | -0.969738 |
| 50        | 1           | 0      | -2.802791               | 0.892827  | -1.926393 |
| 51        | 6           | 0      | -4.025291               | -0.705805 | 0.065441  |
| 52        | 8           | 0      | -3.928100               | -1.844717 | 0.468870  |
| 53        | 8           | 0      | -5.144752               | -0.206060 | -0.492733 |
| 54        | 6           | 0      | -6.246813               | -1.125299 | -0.598901 |
| 55        | 1           | 0      | -7.053118               | -0.559318 | -1.065630 |
| 56        | 1           | 0      | -6.545490               | -1.478123 | 0.391420  |
| 57        | 1           | 0      | -5.968001               | -1.982853 | -1.216150 |
| 58        | 8           | 0      | -1.921257               | 2.358148  | -0.848440 |
| 59        | 6           | 0      | -2.134722               | 3.379801  | 0.016231  |
| 60        | 6           | 0      | -0.977212               | 4.350120  | -0.005925 |
| 61        | 1           | 0      | -0.818492               | 4.725850  | -1.021769 |
| 62        | 1           | 0      | -0.056242               | 3.842995  | 0.301177  |
| 63        | 1           | 0      | -1.185016               | 5.179146  | 0.671250  |
| 64        | 8           | 0      | -3.126076               | 3.483598  | 0.705809  |
| Conformer | <b>1b-3</b> |        |                         |           |           |
| Center    | Atomic      | Atomic | Coordinates (Angstroms) |           |           |
| Number    | Number      | Type   | X                       | Y         | Z         |
| 1         | 6           | 0      | 4.020433                | -1.741686 | -1.720264 |
| 2         | 1           | 0      | 4.427732                | -2.690409 | -2.092848 |

|    |   |   |           |           |           |
|----|---|---|-----------|-----------|-----------|
| 3  | 1 | 0 | 3.812249  | -1.136390 | -2.611600 |
| 4  | 6 | 0 | 5.058715  | -1.052603 | -0.831451 |
| 5  | 1 | 0 | 5.980174  | -0.858670 | -1.397623 |
| 6  | 1 | 0 | 5.336051  | -1.747707 | -0.024637 |
| 7  | 6 | 0 | 4.568502  | 0.269841  | -0.189333 |
| 8  | 6 | 0 | 3.176435  | 0.014345  | 0.495139  |
| 9  | 6 | 0 | 2.080471  | -0.739535 | -0.342555 |
| 10 | 6 | 0 | 2.725870  | -2.018211 | -0.945721 |
| 11 | 1 | 0 | 2.955170  | -2.718296 | -0.128631 |
| 12 | 1 | 0 | 2.013124  | -2.531080 | -1.602480 |
| 13 | 6 | 0 | 2.563550  | 1.246487  | 1.184957  |
| 14 | 1 | 0 | 3.335447  | 1.825338  | 1.702354  |
| 15 | 1 | 0 | 2.116933  | 1.926598  | 0.449131  |
| 16 | 6 | 0 | 1.525872  | 0.799247  | 2.215593  |
| 17 | 1 | 0 | 1.066027  | 1.657145  | 2.722471  |
| 18 | 1 | 0 | 2.027705  | 0.214530  | 2.996007  |
| 19 | 6 | 0 | 0.415768  | -0.108355 | 1.663790  |
| 20 | 6 | 0 | 0.958231  | -1.191192 | 0.675173  |
| 21 | 1 | 0 | 1.427392  | -1.942485 | 1.323824  |
| 22 | 6 | 0 | 4.584416  | 1.410102  | -1.232775 |
| 23 | 1 | 0 | 4.085446  | 1.149384  | -2.169322 |
| 24 | 1 | 0 | 5.621984  | 1.662528  | -1.484294 |
| 25 | 1 | 0 | 4.112838  | 2.320431  | -0.846406 |
| 26 | 6 | 0 | 5.596332  | 0.648099  | 0.903925  |
| 27 | 1 | 0 | 5.418596  | 1.645622  | 1.319916  |
| 28 | 1 | 0 | 6.608279  | 0.651142  | 0.480650  |
| 29 | 1 | 0 | 5.585030  | -0.070513 | 1.732573  |
| 30 | 6 | 0 | 1.500989  | 0.111218  | -1.496607 |
| 31 | 1 | 0 | 2.278173  | 0.419048  | -2.196200 |
| 32 | 1 | 0 | 0.995236  | 1.015980  | -1.152081 |
| 33 | 1 | 0 | 0.774874  | -0.465192 | -2.079055 |
| 34 | 6 | 0 | -0.738154 | 0.693564  | 1.088245  |
| 35 | 1 | 0 | -0.981758 | 1.599269  | 1.644095  |
| 36 | 6 | 0 | -1.527159 | 0.316834  | 0.063204  |
| 37 | 6 | 0 | -1.236359 | -0.943203 | -0.653246 |
| 38 | 6 | 0 | -0.240628 | -1.901016 | 0.013515  |
| 39 | 1 | 0 | 0.078578  | -2.616070 | -0.751864 |
| 40 | 8 | 0 | -0.944528 | -2.607665 | 1.055482  |
| 41 | 1 | 0 | -1.893272 | -2.684315 | 0.827300  |
| 42 | 8 | 0 | -1.826151 | -1.273460 | -1.676766 |
| 43 | 1 | 0 | 3.421458  | -0.689292 | 1.308542  |
| 44 | 8 | 0 | -0.138637 | -0.736642 | 2.833931  |



| 45        | 1           | 0      | -0.683553               | -1.477727 | 2.494763  |
|-----------|-------------|--------|-------------------------|-----------|-----------|
| 46        | 6           | 0      | -2.750780               | 1.099173  | -0.403344 |
| 47        | 1           | 0      | -2.867713               | 0.902757  | -1.474503 |
| 48        | 6           | 0      | -4.060501               | 0.668399  | 0.299559  |
| 49        | 1           | 0      | -4.779172               | 1.487743  | 0.290365  |
| 50        | 1           | 0      | -3.881831               | 0.351386  | 1.327939  |
| 51        | 6           | 0      | -2.531329               | 2.592722  | -0.217783 |
| 52        | 8           | 0      | -3.019356               | 3.266124  | 0.666230  |
| 53        | 8           | 0      | -1.696183               | 3.081555  | -1.156388 |
| 54        | 6           | 0      | -1.387993               | 4.482125  | -1.041021 |
| 55        | 1           | 0      | -2.298782               | 5.081976  | -1.113176 |
| 56        | 1           | 0      | -0.716341               | 4.701080  | -1.871173 |
| 57        | 1           | 0      | -0.900153               | 4.690148  | -0.084969 |
| 58        | 8           | 0      | -4.710508               | -0.395367 | -0.434451 |
| 59        | 6           | 0      | -4.403556               | -1.666738 | -0.131064 |
| 60        | 6           | 0      | -5.048608               | -2.632736 | -1.088393 |
| 61        | 1           | 0      | -4.380832               | -2.738085 | -1.951854 |
| 62        | 1           | 0      | -6.012296               | -2.261468 | -1.443507 |
| 63        | 1           | 0      | -5.160501               | -3.606951 | -0.609477 |
| 64        | 8           | 0      | -3.667812               | -1.985638 | 0.788028  |
| Conformer | <b>1b-4</b> |        |                         |           |           |
| Center    | Atomic      | Atomic | Coordinates (Angstroms) |           |           |
| Number    | Number      | Type   | X                       | Y         | Z         |
| 1         | 6           | 0      | -4.438796               | -1.010783 | 1.557891  |
| 2         | 1           | 0      | -5.220538               | -1.763738 | 1.721616  |
| 3         | 1           | 0      | -3.923047               | -0.901944 | 2.519908  |
| 4         | 6           | 0      | -5.082862               | 0.314007  | 1.142214  |
| 5         | 1           | 0      | -5.767635               | 0.668394  | 1.924935  |
| 6         | 1           | 0      | -5.703727               | 0.130691  | 0.252212  |
| 7         | 6           | 0      | -4.069030               | 1.437151  | 0.805566  |
| 8         | 6           | 0      | -3.005735               | 0.869576  | -0.202536 |
| 9         | 6           | 0      | -2.333806               | -0.507406 | 0.153368  |
| 10        | 6           | 0      | -3.467221               | -1.518429 | 0.484774  |
| 11        | 1           | 0      | -4.038720               | -1.725051 | -0.432355 |
| 12        | 1           | 0      | -3.042528               | -2.476087 | 0.809281  |
| 13        | 6           | 0      | -1.942898               | 1.887900  | -0.653674 |
| 14        | 1           | 0      | -2.397500               | 2.867115  | -0.835371 |
| 15        | 1           | 0      | -1.188829               | 2.042769  | 0.128093  |
| 16        | 6           | 0      | -1.286445               | 1.413406  | -1.950878 |
| 17        | 1           | 0      | -0.527240               | 2.123792  | -2.302274 |
| 18        | 1           | 0      | -2.045087               | 1.356332  | -2.740787 |
| 19        | 6           | 0      | -0.655465               | 0.018921  | -1.859049 |

|    |   |   |           |           |           |
|----|---|---|-----------|-----------|-----------|
| 20 | 6 | 0 | -1.593074 | -1.005097 | -1.152346 |
| 21 | 1 | 0 | -2.382318 | -1.215552 | -1.886117 |
| 22 | 6 | 0 | -3.477983 | 2.038866  | 2.099733  |
| 23 | 1 | 0 | -3.072592 | 1.288552  | 2.781620  |
| 24 | 1 | 0 | -4.261797 | 2.579221  | 2.644906  |
| 25 | 1 | 0 | -2.678917 | 2.756087  | 1.881811  |
| 26 | 6 | 0 | -4.866327 | 2.565446  | 0.108042  |
| 27 | 1 | 0 | -5.731584 | 2.846172  | 0.721136  |
| 28 | 1 | 0 | -5.243340 | 2.245891  | -0.871390 |
| 29 | 1 | 0 | -4.269552 | 3.471975  | -0.038771 |
| 30 | 6 | 0 | -1.366527 | -0.440087 | 1.355829  |
| 31 | 1 | 0 | -1.892590 | -0.207327 | 2.281939  |
| 32 | 1 | 0 | -0.568203 | 0.293728  | 1.239480  |
| 33 | 1 | 0 | -0.875191 | -1.405280 | 1.520140  |
| 34 | 6 | 0 | 0.732072  | 0.070121  | -1.240597 |
| 35 | 1 | 0 | 1.288945  | 0.985750  | -1.425376 |
| 36 | 6 | 0 | 1.336352  | -0.953779 | -0.608524 |
| 37 | 6 | 0 | 0.596795  | -2.216518 | -0.418003 |
| 38 | 6 | 0 | -0.836281 | -2.328987 | -0.960610 |
| 39 | 1 | 0 | -1.377337 | -3.012717 | -0.298676 |
| 40 | 8 | 0 | -0.707426 | -2.946924 | -2.263993 |
| 41 | 1 | 0 | -0.190407 | -3.761162 | -2.137009 |
| 42 | 8 | 0 | 1.127197  | -3.224069 | 0.041563  |
| 43 | 1 | 0 | -3.604399 | 0.649225  | -1.102676 |
| 44 | 8 | 0 | -0.441187 | -0.365950 | -3.232680 |
| 45 | 1 | 0 | -0.284486 | -1.330190 | -3.232046 |
| 46 | 6 | 0 | 2.772371  | -0.965526 | -0.122232 |
| 47 | 1 | 0 | 3.185915  | -1.953280 | -0.363745 |
| 48 | 6 | 0 | 3.716066  | 0.052843  | -0.763800 |
| 49 | 1 | 0 | 3.624334  | 0.038248  | -1.854453 |
| 50 | 1 | 0 | 4.751495  | -0.169269 | -0.500912 |
| 51 | 6 | 0 | 2.838008  | -0.868654 | 1.407242  |
| 52 | 8 | 0 | 1.919572  | -0.590698 | 2.143816  |
| 53 | 8 | 0 | 4.087579  | -1.141640 | 1.838690  |
| 54 | 6 | 0 | 4.275911  | -1.082416 | 3.263081  |
| 55 | 1 | 0 | 5.326153  | -1.323444 | 3.428780  |
| 56 | 1 | 0 | 3.629921  | -1.808780 | 3.762742  |
| 57 | 1 | 0 | 4.045661  | -0.082137 | 3.639131  |
| 58 | 8 | 0 | 3.383498  | 1.371888  | -0.276039 |
| 59 | 6 | 0 | 4.291849  | 2.348014  | -0.541979 |
| 60 | 6 | 0 | 3.833857  | 3.672423  | 0.020436  |
| 61 | 1 | 0 | 4.633582  | 4.406181  | -0.085158 |

|    |   |   |          |          |           |
|----|---|---|----------|----------|-----------|
| 62 | 1 | 0 | 3.551869 | 3.565919 | 1.072193  |
| 63 | 1 | 0 | 2.947782 | 4.019392 | -0.522733 |
| 64 | 8 | 0 | 5.315383 | 2.154215 | -1.156828 |

**Table S5.** Conformers and Boltzmann distributions of the optimized **1c**

| Compound  | conformer   | Energy (Hartree) | Energy (kcal/mol) | Population (%) |
|-----------|-------------|------------------|-------------------|----------------|
| <b>1c</b> | <b>1c-1</b> | -1423.277815     | -893120.3061      | 26.81          |
| <b>1c</b> | <b>1c-2</b> | -1423.277862     | -893120.3353      | 28.16          |
| <b>1c</b> | <b>1c-3</b> | -1423.276447     | -893119.4474      | 6.29           |
| <b>1c</b> | <b>1c-4</b> | -1423.27773      | -893120.2527      | 24.5           |
| <b>1c</b> | <b>1c-5</b> | -1423.277218     | -893119.9313      | 14.24          |

**Table S6.** Cartesian coordinates of optimized **1c**

| Conformer | <b>1c-1</b> |        |                         |           |           |
|-----------|-------------|--------|-------------------------|-----------|-----------|
| Center    | Atomic      | Atomic | Coordinates (Angstroms) |           |           |
| Number    | Number      | Type   | X                       | Y         | Z         |
| 1         | 6           | 0      | 4.577893                | -0.921253 | 1.700955  |
| 2         | 1           | 0      | 4.924612                | -1.093570 | 2.728401  |
| 3         | 1           | 0      | 4.899380                | -1.801148 | 1.128862  |
| 4         | 6           | 0      | 5.233903                | 0.343880  | 1.146407  |
| 5         | 1           | 0      | 6.328119                | 0.241159  | 1.135921  |
| 6         | 1           | 0      | 5.010841                | 1.176204  | 1.831307  |
| 7         | 6           | 0      | 4.748191                | 0.738552  | -0.270300 |
| 8         | 6           | 0      | 3.176476                | 0.733713  | -0.286405 |
| 9         | 6           | 0      | 2.447500                | -0.542009 | 0.292605  |
| 10        | 6           | 0      | 3.047668                | -0.811243 | 1.702306  |
| 11        | 1           | 0      | 2.759402                | 0.012228  | 2.373291  |
| 12        | 1           | 0      | 2.608047                | -1.714415 | 2.126676  |
| 13        | 6           | 0      | 2.567146                | 1.176026  | -1.628596 |
| 14        | 1           | 0      | 3.108897                | 2.036024  | -2.034978 |
| 15        | 1           | 0      | 2.637195                | 0.379321  | -2.376665 |
| 16        | 6           | 0      | 1.101240                | 1.567990  | -1.441582 |
| 17        | 1           | 0      | 0.649805                | 1.875116  | -2.392612 |
| 18        | 1           | 0      | 1.033426                | 2.421518  | -0.752463 |
| 19        | 6           | 0      | 0.274146                | 0.408184  | -0.879198 |
| 20        | 6           | 0      | 0.919877                | -0.156152 | 0.432389  |
| 21        | 1           | 0      | 0.882595                | 0.667508  | 1.161329  |
| 22        | 6           | 0      | 5.403347                | -0.164255 | -1.338662 |
| 23        | 1           | 0      | 6.481580                | 0.035915  | -1.378043 |
| 24        | 1           | 0      | 4.998282                | 0.033787  | -2.337292 |
| 25        | 1           | 0      | 5.280975                | -1.230489 | -1.137515 |

|           |             |        |                         |           |           |
|-----------|-------------|--------|-------------------------|-----------|-----------|
| 26        | 6           | 0      | 5.252239                | 2.179050  | -0.528813 |
| 27        | 1           | 0      | 6.326551                | 2.241317  | -0.315327 |
| 28        | 1           | 0      | 4.743692                | 2.905258  | 0.117648  |
| 29        | 1           | 0      | 5.112680                | 2.494870  | -1.568101 |
| 30        | 6           | 0      | 2.594794                | -1.821694 | -0.561869 |
| 31        | 1           | 0      | 3.625546                | -2.178269 | -0.582427 |
| 32        | 1           | 0      | 2.253503                | -1.685634 | -1.588687 |
| 33        | 1           | 0      | 1.997730                | -2.628175 | -0.121027 |
| 34        | 6           | 0      | -1.157560               | 0.842455  | -0.655245 |
| 35        | 1           | 0      | -1.552101               | 1.556231  | -1.378307 |
| 36        | 6           | 0      | -1.979244               | 0.297697  | 0.259007  |
| 37        | 6           | 0      | -1.440134               | -0.700583 | 1.201454  |
| 38        | 6           | 0      | -0.030290               | -1.255245 | 0.962194  |
| 39        | 1           | 0      | -0.154125               | -2.011722 | 0.166780  |
| 40        | 8           | 0      | 0.402399                | -1.883982 | 2.147299  |
| 41        | 1           | 0      | -0.415468               | -2.029718 | 2.664074  |
| 42        | 8           | 0      | -2.096692               | -1.142682 | 2.141493  |
| 43        | 1           | 0      | 2.915536                | 1.528445  | 0.434366  |
| 44        | 8           | 0      | 0.206301                | -0.560939 | -1.947537 |
| 45        | 1           | 0      | -0.584365               | -1.120392 | -1.834641 |
| 46        | 6           | 0      | -3.478314               | 0.567985  | 0.307777  |
| 47        | 1           | 0      | -3.845307               | 0.244213  | 1.285696  |
| 48        | 6           | 0      | -4.227436               | -0.211944 | -0.792927 |
| 49        | 1           | 0      | -3.756595               | -0.070971 | -1.766864 |
| 50        | 1           | 0      | -5.269282               | 0.109912  | -0.843974 |
| 51        | 6           | 0      | -3.759236               | 2.052597  | 0.140943  |
| 52        | 8           | 0      | -3.985751               | 2.594539  | -0.922464 |
| 53        | 8           | 0      | -3.699134               | 2.700152  | 1.318008  |
| 54        | 6           | 0      | -3.896005               | 4.124933  | 1.253395  |
| 55        | 1           | 0      | -4.880675               | 4.356005  | 0.839398  |
| 56        | 1           | 0      | -3.128189               | 4.588788  | 0.628785  |
| 57        | 1           | 0      | -3.818503               | 4.475089  | 2.282573  |
| 58        | 8           | 0      | -4.295869               | -1.619556 | -0.477237 |
| 59        | 6           | 0      | -3.340002               | -2.447012 | -0.944836 |
| 60        | 6           | 0      | -3.591327               | -3.862770 | -0.490736 |
| 61        | 1           | 0      | -4.638928               | -4.138161 | -0.639265 |
| 62        | 1           | 0      | -3.380298               | -3.932501 | 0.582586  |
| 63        | 1           | 0      | -2.935079               | -4.543292 | -1.034160 |
| 64        | 8           | 0      | -2.392342               | -2.091766 | -1.620426 |
| Conformer | <b>1c-2</b> |        |                         |           |           |
| Center    | Atomic      | Atomic | Coordinates (Angstroms) |           |           |
| Number    | Number      | Type   | X                       | Y         | Z         |

|    |   |   |           |           |           |
|----|---|---|-----------|-----------|-----------|
| 1  | 6 | 0 | 4.606327  | 0.596331  | 1.779056  |
| 2  | 1 | 0 | 4.979191  | 1.177647  | 2.632611  |
| 3  | 1 | 0 | 4.981370  | -0.423984 | 1.929884  |
| 4  | 6 | 0 | 5.161634  | 1.183016  | 0.480808  |
| 5  | 1 | 0 | 6.260119  | 1.147415  | 0.477696  |
| 6  | 1 | 0 | 4.889661  | 2.248838  | 0.441166  |
| 7  | 6 | 0 | 4.628835  | 0.499884  | -0.803331 |
| 8  | 6 | 0 | 3.061182  | 0.414723  | -0.719126 |
| 9  | 6 | 0 | 2.436853  | -0.167748 | 0.609486  |
| 10 | 6 | 0 | 3.072736  | 0.612364  | 1.795243  |
| 11 | 1 | 0 | 2.736223  | 1.659476  | 1.750536  |
| 12 | 1 | 0 | 2.701445  | 0.215151  | 2.740446  |
| 13 | 6 | 0 | 2.402733  | -0.192882 | -1.970440 |
| 14 | 1 | 0 | 2.882002  | 0.179469  | -2.881152 |
| 15 | 1 | 0 | 2.508275  | -1.282895 | -1.981935 |
| 16 | 6 | 0 | 0.919107  | 0.169513  | -2.013699 |
| 17 | 1 | 0 | 0.430161  | -0.264496 | -2.896878 |
| 18 | 1 | 0 | 0.806260  | 1.260786  | -2.093949 |
| 19 | 6 | 0 | 0.180036  | -0.319714 | -0.762749 |
| 20 | 6 | 0 | 0.887335  | 0.144421  | 0.549133  |
| 21 | 1 | 0 | 0.802258  | 1.241048  | 0.557521  |
| 22 | 6 | 0 | 5.332715  | -0.855652 | -1.031040 |
| 23 | 1 | 0 | 6.393305  | -0.686115 | -1.255487 |
| 24 | 1 | 0 | 4.901556  | -1.394215 | -1.882458 |
| 25 | 1 | 0 | 5.289046  | -1.518053 | -0.164052 |
| 26 | 6 | 0 | 5.022158  | 1.414652  | -1.988641 |
| 27 | 1 | 0 | 6.092465  | 1.649686  | -1.937815 |
| 28 | 1 | 0 | 4.472923  | 2.364206  | -1.963467 |
| 29 | 1 | 0 | 4.842784  | 0.945255  | -2.961750 |
| 30 | 6 | 0 | 2.668275  | -1.680822 | 0.827666  |
| 31 | 1 | 0 | 3.721679  | -1.908110 | 0.997359  |
| 32 | 1 | 0 | 2.315200  | -2.287334 | -0.007416 |
| 33 | 1 | 0 | 2.131395  | -2.009405 | 1.724169  |
| 34 | 6 | 0 | -1.262921 | 0.144056  | -0.792784 |
| 35 | 1 | 0 | -1.704462 | 0.274435  | -1.780376 |
| 36 | 6 | 0 | -2.036771 | 0.275465  | 0.297569  |
| 37 | 6 | 0 | -1.420614 | 0.128071  | 1.630480  |
| 38 | 6 | 0 | 0.021898  | -0.385241 | 1.721399  |
| 39 | 1 | 0 | -0.053582 | -1.479137 | 1.603510  |
| 40 | 8 | 0 | 0.521534  | -0.066953 | 3.000555  |
| 41 | 1 | 0 | -0.274346 | 0.117705  | 3.538936  |
| 42 | 8 | 0 | -2.025213 | 0.381551  | 2.668358  |

| 43        | 1           | 0      | 2.753193                | 1.474909  | -0.706790 |
|-----------|-------------|--------|-------------------------|-----------|-----------|
| 44        | 8           | 0      | 0.140402                | -1.767796 | -0.769221 |
| 45        | 1           | 0      | -0.573179               | -2.052924 | -1.371062 |
| 46        | 6           | 0      | -3.539360               | 0.525337  | 0.224420  |
| 47        | 1           | 0      | -3.904561               | 0.607694  | 1.251136  |
| 48        | 6           | 0      | -4.258446               | -0.619625 | -0.511086 |
| 49        | 1           | 0      | -3.983078               | -0.645960 | -1.564686 |
| 50        | 1           | 0      | -5.342543               | -0.513899 | -0.421770 |
| 51        | 6           | 0      | -3.820968               | 1.833262  | -0.504897 |
| 52        | 8           | 0      | -3.990544               | 1.929314  | -1.703708 |
| 53        | 8           | 0      | -3.825167               | 2.876638  | 0.342158  |
| 54        | 6           | 0      | -4.017804               | 4.168172  | -0.264069 |
| 55        | 1           | 0      | -3.983783               | 4.882128  | 0.558668  |
| 56        | 1           | 0      | -4.983996               | 4.210842  | -0.773168 |
| 57        | 1           | 0      | -3.223975               | 4.373298  | -0.986925 |
| 58        | 8           | 0      | -3.935527               | -1.884142 | 0.110077  |
| 59        | 6           | 0      | -3.090144               | -2.716112 | -0.533941 |
| 60        | 6           | 0      | -2.797601               | -3.948542 | 0.283387  |
| 61        | 1           | 0      | -2.809618               | -4.825011 | -0.369362 |
| 62        | 1           | 0      | -3.503157               | -4.071631 | 1.106111  |
| 63        | 1           | 0      | -1.783420               | -3.851677 | 0.688415  |
| 64        | 8           | 0      | -2.599232               | -2.487703 | -1.625060 |
| Conformer | <b>1c-3</b> |        |                         |           |           |
| Center    | Atomic      | Atomic | Coordinates (Angstroms) |           |           |
| Number    | Number      | Type   | X                       | Y         | Z         |
| 1         | 6           | 0      | -4.799994               | -1.117013 | -1.732227 |
| 2         | 1           | 0      | -5.013510               | -1.503238 | -2.737485 |
| 3         | 1           | 0      | -5.320686               | -1.790865 | -1.039808 |
| 4         | 6           | 0      | -5.349129               | 0.304928  | -1.605184 |
| 5         | 1           | 0      | -6.436981               | 0.315211  | -1.760839 |
| 6         | 1           | 0      | -4.918182               | 0.915246  | -2.413484 |
| 7         | 6           | 0      | -5.023278               | 0.990647  | -0.254859 |
| 8         | 6           | 0      | -3.485299               | 0.836133  | 0.030067  |
| 9         | 6           | 0      | -2.868001               | -0.611935 | -0.097265 |
| 10        | 6           | 0      | -3.286384               | -1.164498 | -1.490041 |
| 11        | 1           | 0      | -2.791368               | -0.565956 | -2.270239 |
| 12        | 1           | 0      | -2.916366               | -2.183053 | -1.609486 |
| 13        | 6           | 0      | -3.014301               | 1.546644  | 1.312408  |
| 14        | 1           | 0      | -3.486582               | 2.529270  | 1.407003  |
| 15        | 1           | 0      | -3.293715               | 0.976151  | 2.204901  |
| 16        | 6           | 0      | -1.497251               | 1.735659  | 1.284973  |
| 17        | 1           | 0      | -1.143566               | 2.236855  | 2.198570  |

|    |   |   |           |           |           |
|----|---|---|-----------|-----------|-----------|
| 18 | 1 | 0 | -1.218221 | 2.388991  | 0.445921  |
| 19 | 6 | 0 | -0.761363 | 0.397660  | 1.145251  |
| 20 | 6 | 0 | -1.298568 | -0.430846 | -0.061850 |
| 21 | 1 | 0 | -1.048808 | 0.161075  | -0.954646 |
| 22 | 6 | 0 | -5.939288 | 0.448627  | 0.863797  |
| 23 | 1 | 0 | -5.932981 | -0.640554 | 0.936979  |
| 24 | 1 | 0 | -6.975247 | 0.754349  | 0.671122  |
| 25 | 1 | 0 | -5.658374 | 0.849340  | 1.844223  |
| 26 | 6 | 0 | -5.358295 | 2.492511  | -0.423621 |
| 27 | 1 | 0 | -6.372932 | 2.605171  | -0.824983 |
| 28 | 1 | 0 | -4.669114 | 2.982849  | -1.122548 |
| 29 | 1 | 0 | -5.325921 | 3.040548  | 0.524265  |
| 30 | 6 | 0 | -3.316771 | -1.612691 | 0.992157  |
| 31 | 1 | 0 | -4.370137 | -1.876623 | 0.888266  |
| 32 | 1 | 0 | -3.154363 | -1.238371 | 2.003662  |
| 33 | 1 | 0 | -2.750464 | -2.544675 | 0.892263  |
| 34 | 6 | 0 | 0.734816  | 0.632058  | 1.022586  |
| 35 | 1 | 0 | 1.128101  | 1.507741  | 1.541875  |
| 36 | 6 | 0 | 1.582295  | -0.179156 | 0.368509  |
| 37 | 6 | 0 | 1.030591  | -1.347391 | -0.344629 |
| 38 | 6 | 0 | -0.433595 | -1.721707 | -0.117157 |
| 39 | 1 | 0 | -0.473966 | -2.193708 | 0.877436  |
| 40 | 8 | 0 | -0.817714 | -2.643941 | -1.110328 |
| 41 | 1 | 0 | 0.022297  | -2.952427 | -1.506096 |
| 42 | 8 | 0 | 1.713736  | -2.022925 | -1.111303 |
| 43 | 1 | 0 | -3.018795 | 1.391115  | -0.802680 |
| 44 | 8 | 0 | -0.972464 | -0.388853 | 2.342484  |
| 45 | 1 | 0 | -0.536800 | 0.072060  | 3.078163  |
| 46 | 6 | 0 | 3.073603  | 0.084385  | 0.259660  |
| 47 | 1 | 0 | 3.314253  | 0.868802  | 0.985929  |
| 48 | 6 | 0 | 3.444847  | 0.625648  | -1.135574 |
| 49 | 1 | 0 | 2.687591  | 1.347744  | -1.449589 |
| 50 | 1 | 0 | 3.520437  | -0.181820 | -1.861194 |
| 51 | 6 | 0 | 3.847278  | -1.160225 | 0.704884  |
| 52 | 8 | 0 | 3.532247  | -1.824990 | 1.668443  |
| 53 | 8 | 0 | 4.926644  | -1.407439 | -0.056499 |
| 54 | 6 | 0 | 5.687428  | -2.569419 | 0.315891  |
| 55 | 1 | 0 | 5.069737  | -3.467494 | 0.236747  |
| 56 | 1 | 0 | 6.052740  | -2.476032 | 1.341813  |
| 57 | 1 | 0 | 6.518731  | -2.610185 | -0.388209 |
| 58 | 8 | 0 | 4.733140  | 1.273438  | -1.148569 |
| 59 | 6 | 0 | 4.777858  | 2.529204  | -0.646294 |

| 60        | 6           | 0      | 6.168525                | 3.105132  | −0.767651 |
|-----------|-------------|--------|-------------------------|-----------|-----------|
| 61        | 1           | 0      | 6.891881                | 2.451274  | −0.270067 |
| 62        | 1           | 0      | 6.191366                | 4.098845  | −0.319328 |
| 63        | 1           | 0      | 6.457293                | 3.166389  | −1.822205 |
| 64        | 8           | 0      | 3.819197                | 3.099690  | −0.167884 |
| Conformer | <b>1c-4</b> |        |                         |           |           |
| Center    | Atomic      | Atomic | Coordinates (Angstroms) |           |           |
| Number    | Number      | Type   | X                       | Y         | Z         |
| 1         | 6           | 0      | −4.470117               | −1.060610 | −1.881282 |
| 2         | 1           | 0      | −4.675614               | −1.226141 | −2.946960 |
| 3         | 1           | 0      | −4.939091               | −1.901994 | −1.355274 |
| 4         | 6           | 0      | −5.100193               | 0.261226  | −1.439205 |
| 5         | 1           | 0      | −6.188802               | 0.240895  | −1.588728 |
| 6         | 1           | 0      | −4.716146               | 1.060978  | −2.090773 |
| 7         | 6           | 0      | −4.796923               | 0.647229  | 0.029714  |
| 8         | 6           | 0      | −3.248803               | 0.528650  | 0.270991  |
| 9         | 6           | 0      | −2.546650               | −0.814063 | −0.178050 |
| 10        | 6           | 0      | −2.952306               | −1.067553 | −1.658244 |
| 11        | 1           | 0      | −2.505931               | −0.281647 | −2.286776 |
| 12        | 1           | 0      | −2.523453               | −2.009485 | −2.001165 |
| 13        | 6           | 0      | −2.804313               | 0.964631  | 1.678322  |
| 14        | 1           | 0      | −3.338053               | 1.867797  | 1.989787  |
| 15        | 1           | 0      | −3.032051               | 0.192265  | 2.420580  |
| 16        | 6           | 0      | −1.303259               | 1.252583  | 1.691316  |
| 17        | 1           | 0      | −0.966822               | 1.560666  | 2.692847  |
| 18        | 1           | 0      | −1.079869               | 2.092472  | 1.017345  |
| 19        | 6           | 0      | −0.488475               | 0.028887  | 1.255808  |
| 20        | 6           | 0      | −0.991078               | −0.546129 | −0.104459 |
| 21        | 1           | 0      | −0.790491               | 0.242015  | −0.844798 |
| 22        | 6           | 0      | −5.660765               | −0.186320 | 1.001056  |
| 23        | 1           | 0      | −5.569123               | −1.262883 | 0.845726  |
| 24        | 1           | 0      | −6.718639               | 0.072472  | 0.867536  |
| 25        | 1           | 0      | −5.404473               | 0.020852  | 2.046235  |
| 26        | 6           | 0      | −5.227140               | 2.124681  | 0.199204  |
| 27        | 1           | 0      | −6.253011               | 2.257248  | −0.165931 |
| 28        | 1           | 0      | −4.581861               | 2.800891  | −0.375637 |
| 29        | 1           | 0      | −5.214650               | 2.451128  | 1.244503  |
| 30        | 6           | 0      | −2.919531               | −2.058718 | 0.659610  |
| 31        | 1           | 0      | −2.285048               | −2.902433 | 0.369055  |
| 32        | 1           | 0      | −3.950253               | −2.368938 | 0.480215  |
| 33        | 1           | 0      | −2.788064               | −1.903985 | 1.731335  |
| 34        | 6           | 0      | 0.986432                | 0.384894  | 1.180337  |



|           |             |        |                         |           |           |
|-----------|-------------|--------|-------------------------|-----------|-----------|
| 35        | 1           | 0      | 1.331679                | 1.143562  | 1.885691  |
| 36        | 6           | 0      | 1.872907                | -0.194674 | 0.354985  |
| 37        | 6           | 0      | 1.388469                | -1.227268 | -0.584404 |
| 38        | 6           | 0      | -0.047128               | -1.733783 | -0.438757 |
| 39        | 1           | 0      | -0.039302               | -2.409379 | 0.431528  |
| 40        | 8           | 0      | -0.390306               | -2.444578 | -1.605648 |
| 41        | 1           | 0      | 0.462462                | -2.619057 | -2.052691 |
| 42        | 8           | 0      | 2.102356                | -1.695645 | -1.467717 |
| 43        | 1           | 0      | -2.829759               | 1.282964  | -0.418205 |
| 44        | 8           | 0      | -0.633811               | -1.014243 | 2.249211  |
| 45        | 1           | 0      | -0.193324               | -0.712422 | 3.060520  |
| 46        | 6           | 0      | 3.337060                | 0.187048  | 0.311189  |
| 47        | 1           | 0      | 3.533767                | 0.881658  | 1.137178  |
| 48        | 6           | 0      | 3.744251                | 0.912731  | -0.989437 |
| 49        | 1           | 0      | 3.673591                | 0.242631  | -1.844049 |
| 50        | 1           | 0      | 4.759348                | 1.298800  | -0.892486 |
| 51        | 6           | 0      | 4.204410                | -1.043925 | 0.586613  |
| 52        | 8           | 0      | 3.860385                | -1.977791 | 1.275600  |
| 53        | 8           | 0      | 5.420772                | -0.940032 | 0.015486  |
| 54        | 6           | 0      | 6.310197                | -2.046288 | 0.254414  |
| 55        | 1           | 0      | 5.875115                | -2.971879 | -0.130096 |
| 56        | 1           | 0      | 6.501377                | -2.157393 | 1.324710  |
| 57        | 1           | 0      | 7.229119                | -1.800445 | -0.277983 |
| 58        | 8           | 0      | 2.846447                | 2.000034  | -1.299398 |
| 59        | 6           | 0      | 2.992024                | 3.136927  | -0.579805 |
| 60        | 6           | 0      | 2.030946                | 4.199010  | -1.059315 |
| 61        | 1           | 0      | 2.229295                | 4.437269  | -2.109503 |
| 62        | 1           | 0      | 2.143488                | 5.095116  | -0.448334 |
| 63        | 1           | 0      | 1.001727                | 3.830291  | -0.999084 |
| 64        | 8           | 0      | 3.792004                | 3.267395  | 0.322476  |
| Conformer | <b>1c-5</b> |        |                         |           |           |
| Center    | Atomic      | Atomic | Coordinates (Angstroms) |           |           |
| Number    | Number      | Type   | X                       | Y         | Z         |
| 1         | 6           | 0      | 4.928404                | -1.506604 | 0.760642  |
| 2         | 1           | 0      | 5.274148                | -2.380612 | 1.328022  |
| 3         | 1           | 0      | 5.514898                | -1.505381 | -0.167212 |
| 4         | 6           | 0      | 5.201620                | -0.235384 | 1.565829  |
| 5         | 1           | 0      | 6.277104                | -0.124679 | 1.763497  |
| 6         | 1           | 0      | 4.718404                | -0.340071 | 2.549208  |
| 7         | 6           | 0      | 4.671656                | 1.059651  | 0.901398  |
| 8         | 6           | 0      | 3.172905                | 0.834514  | 0.485082  |
| 9         | 6           | 0      | 2.835339                | -0.470828 | -0.336562 |

|    |   |   |           |           |           |
|----|---|---|-----------|-----------|-----------|
| 10 | 6 | 0 | 3.434934  | −1.670889 | 0.451116  |
| 11 | 1 | 0 | 2.892429  | −1.775548 | 1.402924  |
| 12 | 1 | 0 | 3.262559  | −2.596182 | −0.099080 |
| 13 | 6 | 0 | 2.502035  | 2.079697  | −0.121351 |
| 14 | 1 | 0 | 2.784155  | 2.980205  | 0.432858  |
| 15 | 1 | 0 | 2.822882  | 2.234963  | −1.157252 |
| 16 | 6 | 0 | 0.980983  | 1.932896  | −0.073881 |
| 17 | 1 | 0 | 0.483401  | 2.815214  | −0.506425 |
| 18 | 1 | 0 | 0.645574  | 1.871358  | 0.970935  |
| 19 | 6 | 0 | 0.503526  | 0.684294  | −0.824369 |
| 20 | 6 | 0 | 1.259735  | −0.593751 | −0.348998 |
| 21 | 1 | 0 | 0.960751  | −0.731675 | 0.699958  |
| 22 | 6 | 0 | 5.598133  | 1.495414  | −0.254392 |
| 23 | 1 | 0 | 5.786289  | 0.701496  | −0.979987 |
| 24 | 1 | 0 | 6.571062  | 1.801915  | 0.149710  |
| 25 | 1 | 0 | 5.186729  | 2.353101  | −0.798513 |
| 26 | 6 | 0 | 4.738154  | 2.171836  | 1.976042  |
| 27 | 1 | 0 | 5.739910  | 2.197653  | 2.422159  |
| 28 | 1 | 0 | 4.020053  | 1.993720  | 2.786325  |
| 29 | 1 | 0 | 4.544649  | 3.168852  | 1.565462  |
| 30 | 6 | 0 | 3.387030  | −0.498007 | −1.780561 |
| 31 | 1 | 0 | 3.095792  | 0.377843  | −2.361759 |
| 32 | 1 | 0 | 3.003561  | −1.380769 | −2.302786 |
| 33 | 1 | 0 | 4.475308  | −0.576172 | −1.796876 |
| 34 | 6 | 0 | −0.998902 | 0.522904  | −0.656676 |
| 35 | 1 | 0 | −1.567210 | 1.441851  | −0.521797 |
| 36 | 6 | 0 | −1.642919 | −0.655192 | −0.686987 |
| 37 | 6 | 0 | −0.846233 | −1.890353 | −0.843028 |
| 38 | 6 | 0 | 0.648019  | −1.773563 | −1.150380 |
| 39 | 1 | 0 | 0.717706  | −1.522151 | −2.221371 |
| 40 | 8 | 0 | 1.250508  | −3.024450 | −0.910196 |
| 41 | 1 | 0 | 0.503616  | −3.654135 | −0.851609 |
| 42 | 8 | 0 | −1.352663 | −3.005751 | −0.754785 |
| 43 | 1 | 0 | 2.666096  | 0.668431  | 1.451695  |
| 44 | 8 | 0 | 0.762953  | 0.851209  | −2.240239 |
| 45 | 1 | 0 | 0.291673  | 1.650227  | −2.528176 |
| 46 | 6 | 0 | −3.134329 | −0.855676 | −0.517669 |
| 47 | 1 | 0 | −3.420884 | −1.719654 | −1.130465 |
| 48 | 6 | 0 | −4.031247 | 0.296807  | −0.973264 |
| 49 | 1 | 0 | −5.073935 | −0.024058 | −1.007784 |
| 50 | 1 | 0 | −3.744302 | 0.645271  | −1.970383 |
| 51 | 6 | 0 | −3.458287 | −1.260030 | 0.928069  |

|    |   |   |           |           |           |
|----|---|---|-----------|-----------|-----------|
| 52 | 8 | 0 | -2.692456 | -1.218780 | 1.861908  |
| 53 | 8 | 0 | -4.738514 | -1.678100 | 1.018518  |
| 54 | 6 | 0 | -5.160231 | -2.091739 | 2.329988  |
| 55 | 1 | 0 | -4.553071 | -2.931590 | 2.677034  |
| 56 | 1 | 0 | -6.203124 | -2.389986 | 2.220567  |
| 57 | 1 | 0 | -5.067234 | -1.266370 | 3.040650  |
| 58 | 8 | 0 | -3.912130 | 1.387748  | -0.032694 |
| 59 | 6 | 0 | -4.788279 | 2.413268  | -0.206012 |
| 60 | 6 | 0 | -4.591512 | 3.471552  | 0.852851  |
| 61 | 1 | 0 | -4.662775 | 3.027973  | 1.850844  |
| 62 | 1 | 0 | -5.346856 | 4.248625  | 0.732333  |
| 63 | 1 | 0 | -3.592728 | 3.912416  | 0.763302  |
| 64 | 8 | 0 | -5.601428 | 2.446000  | -1.100927 |

**Table S7.** Conformers and Boltzmann distributions of the optimized **1d**

| Compound  | conformer   | Energy (Hartree) | Energy (kcal/mol) | Population (%) |
|-----------|-------------|------------------|-------------------|----------------|
| <b>1d</b> | <b>1d-1</b> | -1423.279074     | -893121.0959      | 87.6           |
| <b>1d</b> | <b>1d-2</b> | -1423.276722     | -893119.6202      | 7.26           |
| <b>1d</b> | <b>1d-3</b> | -1423.276396     | -893119.4157      | 5.14           |

**Table S8.** Cartesian coordinates of optimized **1d**

| Conformer | <b>1d-1</b> |        |                         |           |           |
|-----------|-------------|--------|-------------------------|-----------|-----------|
| Center    | Atomic      | Atomic | Coordinates (Angstroms) |           |           |
| Number    | Number      | Type   | X                       | Y         | Z         |
| 1         | 6           | 0      | -4.398108               | -1.597960 | 1.450925  |
| 2         | 1           | 0      | -4.664064               | -2.561783 | 1.904404  |
| 3         | 1           | 0      | -4.736829               | -0.833424 | 2.162116  |
| 4         | 6           | 0      | -5.126951               | -1.443097 | 0.115317  |
| 5         | 1           | 0      | -6.215767               | -1.475834 | 0.261290  |
| 6         | 1           | 0      | -4.876152               | -2.308497 | -0.517055 |
| 7         | 6           | 0      | -4.756857               | -0.153977 | -0.658424 |
| 8         | 6           | 0      | -3.190684               | -0.044871 | -0.736262 |
| 9         | 6           | 0      | -2.383955               | -0.215411 | 0.611024  |
| 10        | 6           | 0      | -2.875348               | -1.533020 | 1.276302  |
| 11        | 1           | 0      | -2.560244               | -2.382674 | 0.652279  |
| 12        | 1           | 0      | -2.382612               | -1.668349 | 2.239676  |
| 13        | 6           | 0      | -2.691890               | 1.161918  | -1.550759 |
| 14        | 1           | 0      | -3.282441               | 1.279952  | -2.464783 |
| 15        | 1           | 0      | -2.799554               | 2.093962  | -0.986265 |

|    |   |   |           |           |           |
|----|---|---|-----------|-----------|-----------|
| 16 | 6 | 0 | -1.226157 | 0.972130  | -1.942115 |
| 17 | 1 | 0 | -0.854111 | 1.836396  | -2.506479 |
| 18 | 1 | 0 | -1.127439 | 0.090585  | -2.590586 |
| 19 | 6 | 0 | -0.327034 | 0.783391  | -0.718086 |
| 20 | 6 | 0 | -0.862471 | -0.364218 | 0.202310  |
| 21 | 1 | 0 | -0.801817 | -1.278703 | -0.406335 |
| 22 | 6 | 0 | -5.455701 | 1.072506  | -0.031413 |
| 23 | 1 | 0 | -5.290033 | 1.160662  | 1.044361  |
| 24 | 1 | 0 | -6.539410 | 0.997552  | -0.186222 |
| 25 | 1 | 0 | -5.124248 | 2.007635  | -0.496420 |
| 26 | 6 | 0 | -5.324429 | -0.313490 | -2.089594 |
| 27 | 1 | 0 | -6.381874 | -0.600983 | -2.039927 |
| 28 | 1 | 0 | -4.794728 | -1.095311 | -2.648278 |
| 29 | 1 | 0 | -5.270484 | 0.613619  | -2.670087 |
| 30 | 6 | 0 | -2.554512 | 0.943856  | 1.619152  |
| 31 | 1 | 0 | -3.567044 | 0.980999  | 2.023348  |
| 32 | 1 | 0 | -2.320832 | 1.917769  | 1.187012  |
| 33 | 1 | 0 | -1.886739 | 0.791691  | 2.474808  |
| 34 | 6 | 0 | 1.103700  | 0.531729  | -1.150524 |
| 35 | 1 | 0 | 1.416940  | 1.049072  | -2.057751 |
| 36 | 6 | 0 | 2.008344  | -0.140498 | -0.419844 |
| 37 | 6 | 0 | 1.567763  | -0.807737 | 0.819434  |
| 38 | 6 | 0 | 0.154893  | -0.545515 | 1.354940  |
| 39 | 1 | 0 | 0.237915  | 0.406422  | 1.909294  |
| 40 | 8 | 0 | -0.173308 | -1.582888 | 2.250753  |
| 41 | 1 | 0 | 0.689145  | -1.950796 | 2.529973  |
| 42 | 8 | 0 | 2.311532  | -1.549038 | 1.456050  |
| 43 | 1 | 0 | -2.905953 | -0.935923 | -1.322895 |
| 44 | 8 | 0 | -0.302132 | 2.081475  | -0.077304 |
| 45 | 1 | 0 | 0.352615  | 2.071865  | 0.645786  |
| 46 | 6 | 0 | 3.490035  | -0.142032 | -0.727681 |
| 47 | 1 | 0 | 3.624696  | 0.217006  | -1.757225 |
| 48 | 6 | 0 | 4.257620  | 0.818981  | 0.201541  |
| 49 | 1 | 0 | 5.328178  | 0.739021  | 0.017645  |
| 50 | 1 | 0 | 4.047481  | 0.610546  | 1.250896  |
| 51 | 6 | 0 | 4.143086  | -1.525045 | -0.670363 |
| 52 | 8 | 0 | 5.245602  | -1.745364 | -0.220140 |
| 53 | 8 | 0 | 3.367387  | -2.451416 | -1.261930 |
| 54 | 6 | 0 | 3.888856  | -3.792063 | -1.239516 |
| 55 | 1 | 0 | 4.009299  | -4.130617 | -0.207481 |
| 56 | 1 | 0 | 4.854768  | -3.837418 | -1.748966 |
| 57 | 1 | 0 | 3.149161  | -4.400624 | -1.760071 |

| 58        | 8           | 0      | 3.913420                | 2.190394  | -0.110116 |
|-----------|-------------|--------|-------------------------|-----------|-----------|
| 59        | 6           | 0      | 2.913641                | 2.776067  | 0.574514  |
| 60        | 6           | 0      | 2.631112                | 4.169081  | 0.071372  |
| 61        | 1           | 0      | 1.683480                | 4.136264  | -0.479230 |
| 62        | 1           | 0      | 3.421854                | 4.538599  | -0.582893 |
| 63        | 1           | 0      | 2.494099                | 4.839493  | 0.923784  |
| 64        | 8           | 0      | 2.282875                | 2.234020  | 1.466285  |
| Conformer | <b>1d-2</b> |        |                         |           |           |
| Center    | Atomic      | Atomic | Coordinates (Angstroms) |           |           |
| Number    | Number      | Type   | X                       | Y         | Z         |
| 1         | 6           | 0      | -4.929492               | 1.835740  | -0.429367 |
| 2         | 1           | 0      | -5.215924               | 2.892735  | -0.351245 |
| 3         | 1           | 0      | -5.362118               | 1.481399  | -1.373955 |
| 4         | 6           | 0      | -5.517401               | 1.060087  | 0.750219  |
| 5         | 1           | 0      | -6.614379               | 1.127780  | 0.750043  |
| 6         | 1           | 0      | -5.180955               | 1.541476  | 1.681077  |
| 7         | 6           | 0      | -5.101161               | -0.431277 | 0.798575  |
| 8         | 6           | 0      | -3.539956               | -0.524567 | 0.641747  |
| 9         | 6           | 0      | -2.882004               | 0.270243  | -0.554706 |
| 10        | 6           | 0      | -3.399484               | 1.735206  | -0.467830 |
| 11        | 1           | 0      | -2.997695               | 2.199034  | 0.445918  |
| 12        | 1           | 0      | -3.003537               | 2.315681  | -1.301526 |
| 13        | 6           | 0      | -2.990663               | -1.958296 | 0.743800  |
| 14        | 1           | 0      | -3.492162               | -2.508499 | 1.545746  |
| 15        | 1           | 0      | -3.172545               | -2.515730 | -0.181398 |
| 16        | 6           | 0      | -1.490166               | -1.928735 | 1.034169  |
| 17        | 1           | 0      | -1.079553               | -2.947612 | 1.106969  |
| 18        | 1           | 0      | -1.308002               | -1.452050 | 2.007638  |
| 19        | 6           | 0      | -0.717761               | -1.165595 | -0.047331 |
| 20        | 6           | 0      | -1.322865               | 0.250465  | -0.295993 |
| 21        | 1           | 0      | -1.168255               | 0.800413  | 0.643271  |
| 22        | 6           | 0      | -5.897811               | -1.251689 | -0.239261 |
| 23        | 1           | 0      | -5.832516               | -0.847502 | -1.251276 |
| 24        | 1           | 0      | -6.959461               | -1.263726 | 0.037772  |
| 25        | 1           | 0      | -5.559359               | -2.293461 | -0.275229 |
| 26        | 6           | 0      | -5.502592               | -0.960505 | 2.196761  |
| 27        | 1           | 0      | -6.553831               | -0.719736 | 2.396917  |
| 28        | 1           | 0      | -4.900408               | -0.499128 | 2.989393  |
| 29        | 1           | 0      | -5.400631               | -2.047740 | 2.283102  |
| 30        | 6           | 0      | -3.198903               | -0.284538 | -1.962440 |
| 31        | 1           | 0      | -4.246697               | -0.136113 | -2.227597 |
| 32        | 1           | 0      | -2.964985               | -1.345142 | -2.064014 |

| 33        | 1           | 0      | -2.609016               | 0.254872  | -2.711125 |
|-----------|-------------|--------|-------------------------|-----------|-----------|
| 34        | 6           | 0      | 0.750389                | -1.068684 | 0.330636  |
| 35        | 1           | 0      | 1.151312                | -1.896871 | 0.917085  |
| 36        | 6           | 0      | 1.569971                | -0.072478 | -0.043373 |
| 37        | 6           | 0      | 1.013793                | 1.037047  | -0.840539 |
| 38        | 6           | 0      | -0.418508               | 0.920888  | -1.365517 |
| 39        | 1           | 0      | -0.364597               | 0.238822  | -2.229960 |
| 40        | 8           | 0      | -0.846264               | 2.196794  | -1.781329 |
| 41        | 1           | 0      | -0.028019               | 2.729794  | -1.841820 |
| 42        | 8           | 0      | 1.672632                | 2.038802  | -1.111497 |
| 43        | 1           | 0      | -3.166083               | 0.000753  | 1.537723  |
| 44        | 8           | 0      | -0.786844               | -1.900547 | -1.294138 |
| 45        | 1           | 0      | -0.378766               | -2.769095 | -1.142541 |
| 46        | 6           | 0      | 3.043125                | -0.024779 | 0.320448  |
| 47        | 1           | 0      | 3.235411                | -0.876629 | 0.981876  |
| 48        | 6           | 0      | 3.934168                | -0.199268 | -0.923658 |
| 49        | 1           | 0      | 4.026405                | 0.733772  | -1.476273 |
| 50        | 1           | 0      | 3.509944                | -0.977994 | -1.561903 |
| 51        | 6           | 0      | 3.323483                | 1.228552  | 1.157913  |
| 52        | 8           | 0      | 2.628908                | 1.565897  | 2.092050  |
| 53        | 8           | 0      | 4.433772                | 1.880521  | 0.773305  |
| 54        | 6           | 0      | 4.732726                | 3.073541  | 1.517575  |
| 55        | 1           | 0      | 5.658840                | 3.458485  | 1.090186  |
| 56        | 1           | 0      | 4.862108                | 2.842161  | 2.577975  |
| 57        | 1           | 0      | 3.924348                | 3.800474  | 1.405824  |
| 58        | 8           | 0      | 5.284103                | -0.571022 | -0.577399 |
| 59        | 6           | 0      | 5.486994                | -1.873761 | -0.270963 |
| 60        | 6           | 0      | 6.945377                | -2.133262 | 0.022377  |
| 61        | 1           | 0      | 7.082311                | -3.181967 | 0.287825  |
| 62        | 1           | 0      | 7.284112                | -1.491662 | 0.842266  |
| 63        | 1           | 0      | 7.553588                | -1.888362 | -0.854614 |
| 64        | 8           | 0      | 4.604137                | -2.706024 | -0.241439 |
| Conformer | <b>1d-3</b> |        |                         |           |           |
| Center    | Atomic      | Atomic | Coordinates (Angstroms) |           |           |
| Number    | Number      | Type   | X                       | Y         | Z         |
| 1         | 6           | 0      | -4.879125               | 1.805304  | -0.966670 |
| 2         | 1           | 0      | -5.104288               | 2.869039  | -1.118163 |
| 3         | 1           | 0      | -5.280178               | 1.289211  | -1.848268 |
| 4         | 6           | 0      | -5.576197               | 1.311817  | 0.302126  |
| 5         | 1           | 0      | -6.665257               | 1.433015  | 0.217880  |
| 6         | 1           | 0      | -5.260623               | 1.951892  | 1.140080  |
| 7         | 6           | 0      | -5.256111               | -0.158407 | 0.669537  |

|    |   |   |           |           |           |
|----|---|---|-----------|-----------|-----------|
| 8  | 6 | 0 | -3.697169 | -0.355255 | 0.639613  |
| 9  | 6 | 0 | -2.927767 | 0.147562  | -0.645693 |
| 10 | 6 | 0 | -3.358343 | 1.623501  | -0.884528 |
| 11 | 1 | 0 | -2.979211 | 2.240457  | -0.055568 |
| 12 | 1 | 0 | -2.882255 | 2.004336  | -1.788357 |
| 13 | 6 | 0 | -3.240091 | -1.760740 | 1.067954  |
| 14 | 1 | 0 | -3.816987 | -2.108828 | 1.930181  |
| 15 | 1 | 0 | -3.402073 | -2.489106 | 0.266000  |
| 16 | 6 | 0 | -1.759290 | -1.738810 | 1.447125  |
| 17 | 1 | 0 | -1.412957 | -2.738007 | 1.754864  |
| 18 | 1 | 0 | -1.605948 | -1.079872 | 2.313273  |
| 19 | 6 | 0 | -0.883559 | -1.251565 | 0.287837  |
| 20 | 6 | 0 | -1.389280 | 0.108433  | -0.285029 |
| 21 | 1 | 0 | -1.254538 | 0.833625  | 0.530314  |
| 22 | 6 | 0 | -6.040933 | -1.129520 | -0.239097 |
| 23 | 1 | 0 | -5.893614 | -0.939579 | -1.303997 |
| 24 | 1 | 0 | -7.115355 | -1.034421 | -0.038038 |
| 25 | 1 | 0 | -5.765616 | -2.172770 | -0.046685 |
| 26 | 6 | 0 | -5.768218 | -0.378010 | 2.113739  |
| 27 | 1 | 0 | -6.809389 | -0.042296 | 2.194103  |
| 28 | 1 | 0 | -5.178991 | 0.194410  | 2.841053  |
| 29 | 1 | 0 | -5.747411 | -1.431108 | 2.413845  |
| 30 | 6 | 0 | -3.198512 | -0.664438 | -1.932884 |
| 31 | 1 | 0 | -3.036353 | -1.735008 | -1.801399 |
| 32 | 1 | 0 | -2.527670 | -0.326110 | -2.729646 |
| 33 | 1 | 0 | -4.215060 | -0.512711 | -2.299230 |
| 34 | 6 | 0 | 0.564676  | -1.144330 | 0.736684  |
| 35 | 1 | 0 | 0.878322  | -1.844417 | 1.513156  |
| 36 | 6 | 0 | 1.462194  | -0.287889 | 0.222164  |
| 37 | 6 | 0 | 1.012860  | 0.662915  | -0.814568 |
| 38 | 6 | 0 | -0.387450 | 0.497697  | -1.407079 |
| 39 | 1 | 0 | -0.322384 | -0.352995 | -2.104737 |
| 40 | 8 | 0 | -0.717632 | 1.673369  | -2.107775 |
| 41 | 1 | 0 | 0.128087  | 2.155212  | -2.207653 |
| 42 | 8 | 0 | 1.732832  | 1.572526  | -1.218345 |
| 43 | 1 | 0 | -3.343444 | 0.324761  | 1.434064  |
| 44 | 8 | 0 | -0.925903 | -2.223602 | -0.785453 |
| 45 | 1 | 0 | -0.626499 | -3.072790 | -0.421049 |
| 46 | 6 | 0 | 2.909908  | -0.219769 | 0.676606  |
| 47 | 1 | 0 | 3.025301  | -0.926643 | 1.508077  |
| 48 | 6 | 0 | 3.882353  | -0.650717 | -0.427014 |
| 49 | 1 | 0 | 4.051822  | 0.141389  | -1.156154 |

|    |   |   |          |           |           |
|----|---|---|----------|-----------|-----------|
| 50 | 1 | 0 | 3.496343 | −1.530865 | −0.952022 |
| 51 | 6 | 0 | 3.185906 | 1.164899  | 1.281921  |
| 52 | 8 | 0 | 2.460204 | 1.675651  | 2.107217  |
| 53 | 8 | 0 | 4.318248 | 1.723771  | 0.826040  |
| 54 | 6 | 0 | 4.603732 | 3.036231  | 1.339348  |
| 55 | 1 | 0 | 5.544489 | 3.331785  | 0.874547  |
| 56 | 1 | 0 | 4.700442 | 3.009224  | 2.427728  |
| 57 | 1 | 0 | 3.804300 | 3.729680  | 1.066947  |
| 58 | 8 | 0 | 5.123027 | −1.001937 | 0.217571  |
| 59 | 6 | 0 | 6.159889 | −1.275235 | −0.610394 |
| 60 | 6 | 0 | 7.409596 | −1.581824 | 0.181640  |
| 61 | 1 | 0 | 7.225169 | −2.404122 | 0.880457  |
| 62 | 1 | 0 | 7.698951 | −0.707782 | 0.774670  |
| 63 | 1 | 0 | 8.216224 | −1.847525 | −0.502315 |
| 64 | 8 | 0 | 6.072005 | −1.267551 | −1.817753 |



Table S9. DP4+ analysis of compound 1

| Nuclei | sp2? | DP4+        | 0.01%    | 99.99%   | 0.00%    | 0.00%    |
|--------|------|-------------|----------|----------|----------|----------|
|        |      | xperimental | Isomer 1 | Isomer 2 | Isomer 3 | Isomer 4 |
| C      |      | 39.7        | 39.95    | 41.58    | 42.35    | 42.24    |
| C      |      | 18.3        | 21.22    | 21.18    | 21.06    | 20.78    |
| C      |      | 41.2        | 42.46    | 42.18    | 43.24    | 42.58    |
| C      |      | 33.1        | 38.11    | 38.24    | 38.33    | 38.22    |
| C      |      | 54.2        | 55.85    | 56.87    | 58.54    | 58.32    |
| C      |      | 19          | 21.04    | 21.69    | 20.44    | 20.25    |
| C      |      | 41.4        | 42.88    | 43.72    | 43.86    | 43.13    |
| C      |      | 69.4        | 73.09    | 72.19    | 74.48    | 74.95    |
| C      |      | 60.2        | 62.19    | 62.58    | 63.1     | 61.42    |
| C      |      | 37.5        | 42.15    | 42.34    | 45.66    | 45.18    |
| C      |      | 71.8        | 75.96    | 77.01    | 77.6     | 76.23    |
| C      | x    | 195.8       | 205.7    | 206.35   | 212.07   | 211.77   |
| C      | x    | 133.6       | 140.22   | 140.44   | 138.17   | 138.12   |
| C      | x    | 154         | 170.31   | 166.79   | 165.03   | 163.53   |
| C      |      | 44.9        | 48.54    | 49.32    | 47.19    | 52.5     |
| C      |      | 62.4        | 65.1     | 67.53    | 67.79    | 65.72    |
| C      | x    | 170.9       | 179.79   | 180.24   | 179.51   | 178.79   |
| C      |      | 33.8        | 33.57    | 33.48    | 33.42    | 33.54    |
| C      |      | 22          | 21.58    | 21.86    | 22.04    | 21.89    |
| C      |      | 17.7        | 19.72    | 18.87    | 15.67    | 15.68    |
| C      |      | 52.3        | 53.61    | 54.16    | 54.31    | 53.79    |
| C      | x    | 170.7       | 180.41   | 181.01   | 181.24   | 183.87   |
| C      |      | 20.8        | 23.12    | 23.05    | 22.69    | 23.43    |

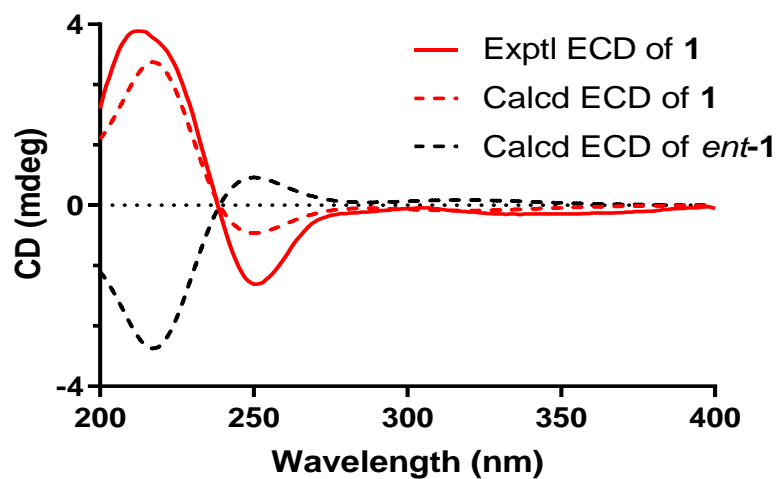

Figure S18. Experimental and calculated ECD spectra of 1

## NMR and ECD calculation method of compound 2

### Calculation details

The random conformational searches were performed by SYBYL X 2.1.1 program using MMFF94s molecular force field. The obtained conformers were subsequently optimized by using Gaussian09 software at the B3LYP/6–31G(d) level in gas phase. The optimized stable conformers were selected for further NMR calculations at the mPW1PW91/6–31+G(d,p) level in chloroform and ECD calculations at the cam-B3LYP/6–31+G(d) level in acetonitrile. The overall theoretical NMR data were analyzed by using linear regression. The overall ECD data were weighted by Boltzmann distribution and produced by SpecDis 1.70.1 software.

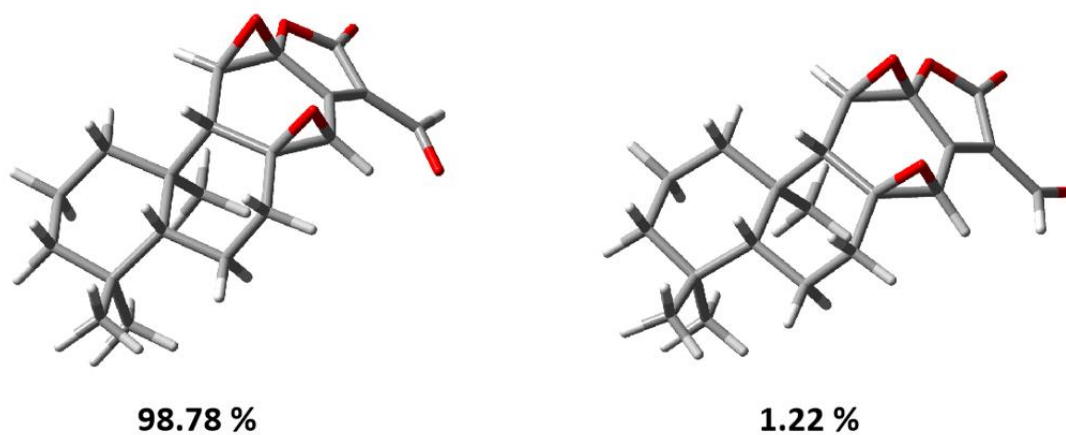

**Figure S19.** Optimized geometries of dominant conformers of conformer **2a** and **2b**

**Table S10.** Energy analysis of **2**

| conformers | B3LYP/6–31G(d) Gibbs free energy (298.15 K) |                   |                |
|------------|---------------------------------------------|-------------------|----------------|
|            | Energy (Hartree)                            | Energy (kcal/mol) | Population (%) |
| <b>2a</b>  | –1152.449824                                | –723173.1769      | 98.78          |
| <b>2b</b>  | –1152.445677                                | –723170.5747      | 1.22           |

**Table S11.** Cartesian coordinates of optimized **2**

| Conformer <b>2a</b> |        |        |                         |           |           |
|---------------------|--------|--------|-------------------------|-----------|-----------|
| Center              | Atomic | Atomic | Coordinates (Angstroms) |           |           |
| Number              | Number | Type   | X                       | Y         | Z         |
| 1                   | 6      | 0      | –2.494048               | 0.477197  | –0.216012 |
| 2                   | 6      | 0      | –1.355687               | –0.604872 | –0.085960 |
| 3                   | 6      | 0      | –1.930847               | 1.894669  | –0.006165 |
| 4                   | 1      | 0      | –2.728512               | 2.639791  | –0.080969 |

|    |   |   |           |           |           |
|----|---|---|-----------|-----------|-----------|
| 5  | 1 | 0 | -1.506187 | 2.001366  | 0.998569  |
| 6  | 6 | 0 | -0.869064 | 2.216610  | -1.061601 |
| 7  | 1 | 0 | -0.406610 | 3.193775  | -0.884462 |
| 8  | 1 | 0 | -1.347331 | 2.273844  | -2.050172 |
| 9  | 6 | 0 | 0.215861  | 1.161255  | -1.160429 |
| 10 | 6 | 0 | -0.286158 | -0.296396 | -1.212764 |
| 11 | 6 | 0 | 1.599761  | 1.498960  | -0.674870 |
| 12 | 1 | 0 | 1.792634  | 2.468156  | -0.224148 |
| 13 | 6 | 0 | 2.462974  | 0.392707  | -0.264080 |
| 14 | 6 | 0 | 2.201865  | -0.965811 | -0.791702 |
| 15 | 6 | 0 | 0.837349  | -1.331349 | -1.207627 |
| 16 | 1 | 0 | 0.552441  | -2.371507 | -1.073115 |
| 17 | 1 | 0 | -2.789833 | 0.423995  | -1.277623 |
| 18 | 6 | 0 | -0.641702 | -0.611156 | 1.286573  |
| 19 | 1 | 0 | -1.323185 | -0.851188 | 2.103355  |
| 20 | 1 | 0 | -0.175912 | 0.349761  | 1.524127  |
| 21 | 1 | 0 | 0.149305  | -1.369472 | 1.303618  |
| 22 | 1 | 0 | -0.799998 | -0.396076 | -2.181577 |
| 23 | 6 | 0 | -1.975705 | -2.003484 | -0.351205 |
| 24 | 1 | 0 | -2.254793 | -2.072225 | -1.413463 |
| 25 | 1 | 0 | -1.235074 | -2.791267 | -0.171992 |
| 26 | 6 | 0 | -3.219201 | -2.293790 | 0.497835  |
| 27 | 1 | 0 | -3.606496 | -3.286953 | 0.238329  |
| 28 | 1 | 0 | -2.951367 | -2.345272 | 1.560841  |
| 29 | 6 | 0 | -4.302324 | -1.239865 | 0.266025  |
| 30 | 1 | 0 | -5.189345 | -1.460969 | 0.874729  |
| 31 | 1 | 0 | -4.627279 | -1.301455 | -0.783527 |
| 32 | 6 | 0 | -3.839108 | 0.209535  | 0.553342  |
| 33 | 6 | 0 | -3.769437 | 0.454122  | 2.076914  |
| 34 | 1 | 0 | -3.363639 | 1.443695  | 2.313265  |
| 35 | 1 | 0 | -3.167969 | -0.287265 | 2.608036  |
| 36 | 1 | 0 | -4.779814 | 0.409530  | 2.501241  |
| 37 | 6 | 0 | -4.930736 | 1.151736  | -0.007791 |
| 38 | 1 | 0 | -4.773500 | 2.196430  | 0.280424  |
| 39 | 1 | 0 | -5.913125 | 0.855865  | 0.379259  |
| 40 | 1 | 0 | -4.978681 | 1.105291  | -1.102711 |
| 41 | 8 | 0 | 1.249632  | 1.515751  | -2.074158 |
| 42 | 6 | 0 | 3.434337  | 0.290031  | 0.674319  |
| 43 | 6 | 0 | 3.862967  | -1.131569 | 0.739337  |
| 44 | 8 | 0 | 3.079565  | -1.854001 | -0.156643 |
| 45 | 8 | 0 | 4.700742  | -1.650244 | 1.427828  |
| 46 | 8 | 0 | 1.929938  | -1.181535 | -2.148289 |

|                     |        |        |                         |           |           |
|---------------------|--------|--------|-------------------------|-----------|-----------|
| 47                  | 6      | 0      | 4.010087                | 1.337159  | 1.532326  |
| 48                  | 1      | 0      | 4.853977                | 1.006291  | 2.166559  |
| 49                  | 8      | 0      | 3.603022                | 2.486496  | 1.560339  |
| Conformer <b>2b</b> |        |        |                         |           |           |
| Center              | Atomic | Atomic | Coordinates (Angstroms) |           |           |
| Number              | Number | Type   | X                       | Y         | Z         |
| 1                   | 6      | 0      | -2.564536               | 0.501158  | -0.136563 |
| 2                   | 6      | 0      | -1.410419               | -0.571139 | -0.112714 |
| 3                   | 6      | 0      | -2.011449               | 1.906933  | 0.161238  |
| 4                   | 1      | 0      | -2.818201               | 2.646045  | 0.159502  |
| 5                   | 1      | 0      | -1.563467               | 1.946350  | 1.161004  |
| 6                   | 6      | 0      | -0.979448               | 2.315865  | -0.893582 |
| 7                   | 1      | 0      | -0.526746               | 3.286435  | -0.660898 |
| 8                   | 1      | 0      | -1.482067               | 2.434229  | -1.864202 |
| 9                   | 6      | 0      | 0.116106                | 1.285673  | -1.091737 |
| 10                  | 6      | 0      | -0.369275               | -0.170215 | -1.237641 |
| 11                  | 6      | 0      | 1.506737                | 1.605383  | -0.623459 |
| 12                  | 1      | 0      | 1.676181                | 2.552731  | -0.114042 |
| 13                  | 6      | 0      | 2.412222                | 0.493421  | -0.315446 |
| 14                  | 6      | 0      | 2.136056                | -0.831978 | -0.917604 |
| 15                  | 6      | 0      | 0.767817                | -1.184965 | -1.327464 |
| 16                  | 1      | 0      | 0.498047                | -2.235595 | -1.260528 |
| 17                  | 1      | 0      | -2.887493               | 0.520870  | -1.191445 |
| 18                  | 6      | 0      | -0.664611               | -0.666614 | 1.238947  |
| 19                  | 1      | 0      | -0.200195               | 0.279898  | 1.531412  |
| 20                  | 1      | 0      | 0.132101                | -1.416944 | 1.185740  |
| 21                  | 1      | 0      | -1.325365               | -0.965994 | 2.052675  |
| 22                  | 1      | 0      | -0.902716               | -0.207765 | -2.200161 |
| 23                  | 6      | 0      | -2.020128               | -1.955296 | -0.465995 |
| 24                  | 1      | 0      | -2.324781               | -1.948330 | -1.523431 |
| 25                  | 1      | 0      | -1.265702               | -2.743820 | -0.364897 |
| 26                  | 6      | 0      | -3.237735               | -2.324515 | 0.388907  |
| 27                  | 1      | 0      | -3.619658               | -3.301053 | 0.066264  |
| 28                  | 1      | 0      | -2.942280               | -2.449969 | 1.438208  |
| 29                  | 6      | 0      | -4.338786               | -1.271218 | 0.262028  |
| 30                  | 1      | 0      | -5.207741               | -1.548922 | 0.873465  |
| 31                  | 1      | 0      | -4.688765               | -1.259778 | -0.781203 |
| 32                  | 6      | 0      | -3.886202               | 0.159250  | 0.644437  |
| 33                  | 6      | 0      | -3.781300               | 0.292333  | 2.180076  |
| 34                  | 1      | 0      | -3.163020               | -0.481113 | 2.642116  |
| 35                  | 1      | 0      | -4.781013               | 0.208559  | 2.623223  |
| 36                  | 1      | 0      | -3.376314               | 1.265454  | 2.478311  |

|    |   |   |           |           |           |
|----|---|---|-----------|-----------|-----------|
| 37 | 6 | 0 | -5.002828 | 1.124624  | 0.180194  |
| 38 | 1 | 0 | -5.971248 | 0.788815  | 0.569837  |
| 39 | 1 | 0 | -5.078755 | 1.155711  | -0.913703 |
| 40 | 1 | 0 | -4.850687 | 2.148147  | 0.538450  |
| 41 | 8 | 0 | 1.123321  | 1.725205  | -2.004917 |
| 42 | 6 | 0 | 3.432935  | 0.350401  | 0.562978  |
| 43 | 6 | 0 | 3.868544  | -1.080633 | 0.534472  |
| 44 | 8 | 0 | 3.036137  | -1.747291 | -0.373138 |
| 45 | 8 | 0 | 4.725765  | -1.654001 | 1.140852  |
| 46 | 8 | 0 | 1.831549  | -0.951207 | -2.282802 |
| 47 | 6 | 0 | 4.024016  | 1.393163  | 1.419816  |
| 48 | 1 | 0 | 3.578375  | 2.402795  | 1.283072  |
| 49 | 8 | 0 | 4.921380  | 1.213976  | 2.215743  |

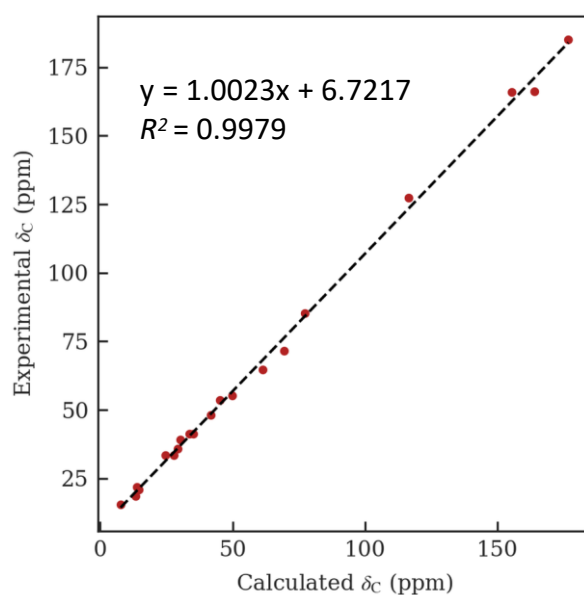

**Figure S20.** Linear correlation plots of predicted versus experimental  $^{13}\text{C}$  NMR chemical shifts

**Table S12.** Parameters of the calculated  $^{13}\text{C}$  NMR chemical shifts of **2**

| CMAD | CLAD | $R^2$  | RMSD   | F       | p      |
|------|------|--------|--------|---------|--------|
| 1.88 | 4.79 | 0.9979 | 2.4544 | 8723.15 | < 0.01 |

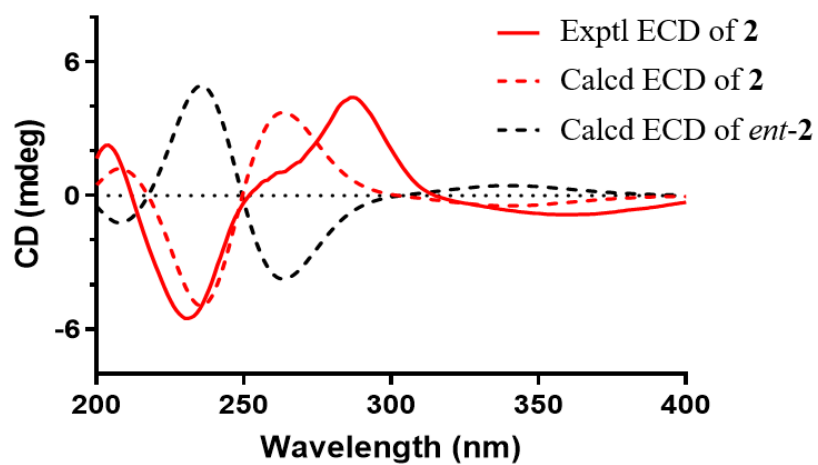

Figure S21. Experimental and calculated ECD spectra of **2**

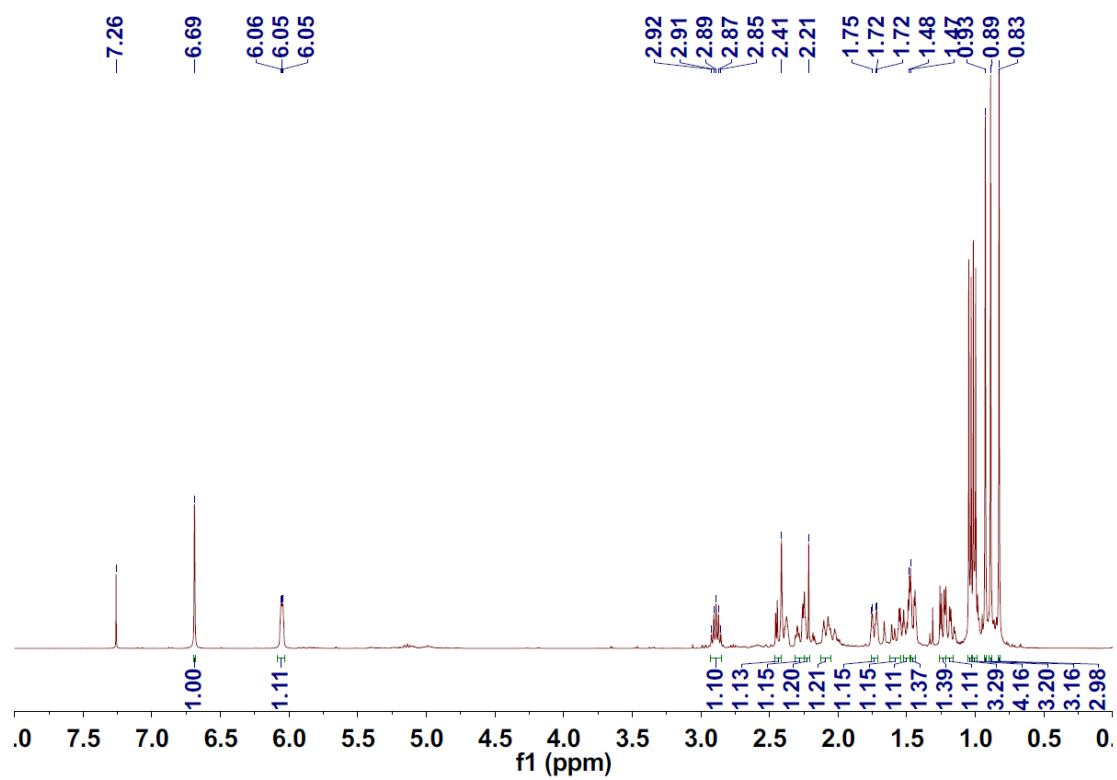

**Figure S22.** <sup>1</sup>H NMR spectrum of **3** in CDCl<sub>3</sub>

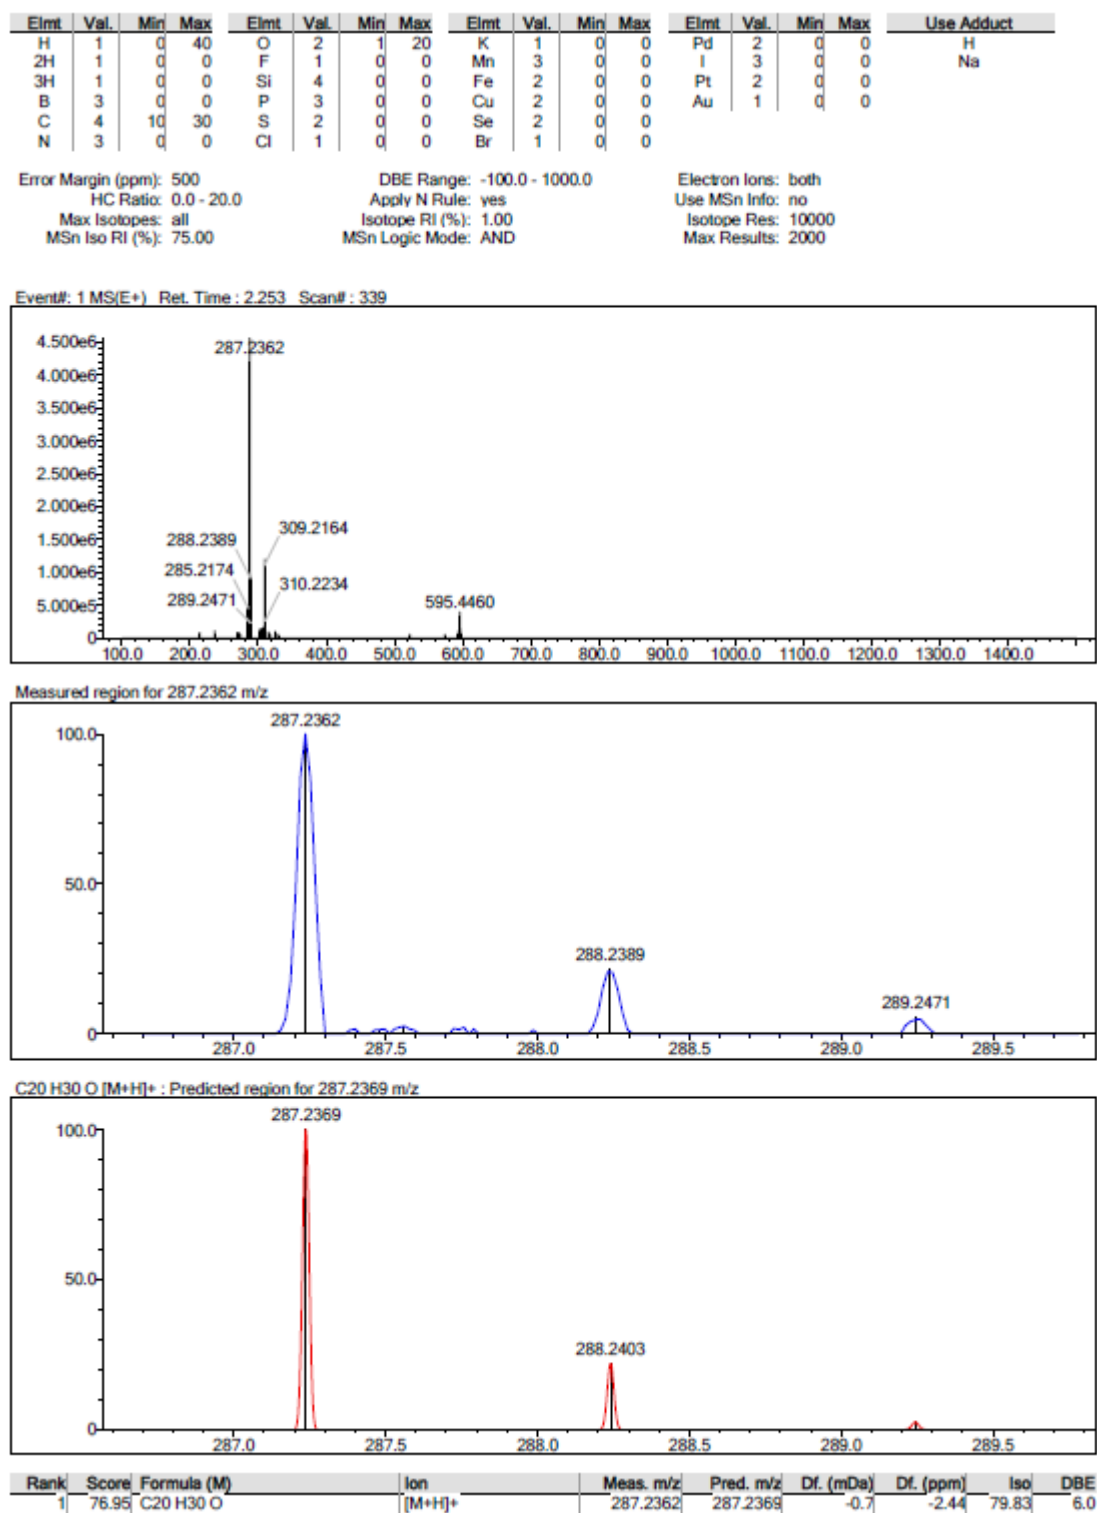

Figure S23. HRESIMS spectrum of 3



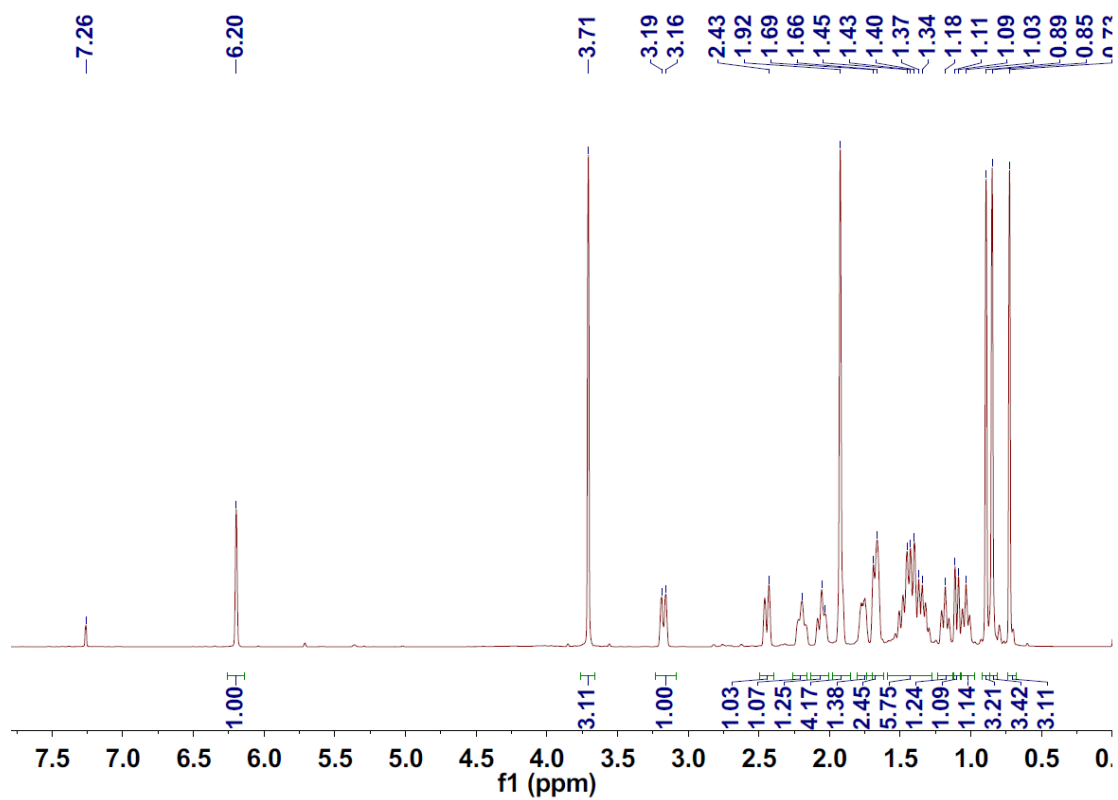

Figure S24. <sup>1</sup>H NMR spectrum of 4 in CDCl<sub>3</sub>

| Elmt | Val. | Min | Max | Use Adduct |
|------|------|-----|-----|------|------|-----|-----|------|------|-----|-----|------|------|-----|-----|------------|
| H    | 1    | 1   | 40  | O    | 2    | 0   | 10  | K    | 1    | 0   | 0   | Pd   | 2    | 0   | 0   | H          |
| 2H   | 1    | 0   | 0   | F    | 1    | 0   | 0   | Mn   | 3    | 0   | 0   | I    | 3    | 0   | 0   | Na         |
| 3H   | 1    | 0   | 0   | Si   | 4    | 0   | 0   | Fe   | 2    | 0   | 0   | Pt   | 2    | 0   | 0   | K          |
| B    | 3    | 0   | 0   | P    | 3    | 0   | 0   | Cu   | 2    | 0   | 0   | Au   | 1    | 0   | 0   | NH4        |
| C    | 4    | 0   | 30  | S    | 2    | 0   | 0   | Se   | 2    | 0   | 0   |      |      |     |     |            |
| N    | 3    | 0   | 0   | Cl   | 1    | 0   | 0   | Br   | 1    | 0   | 0   |      |      |     |     |            |

Error Margin (ppm): 100

HC Ratio: 0.0 - 20.0

Max Isotopes: all

MSn Iso RI (%): 75.00

DBE Range: -100.0 - 100.0

Apply N Rule: yes

Isotope RI (%): 1.00

MSn Logic Mode: AND

Electron Ions: both

Use MSn Info: no

Isotope Res: 10000

Max Results: 2000

Event#: 1 MS(E+) Ret. Time: 3.333 Scan#: 501

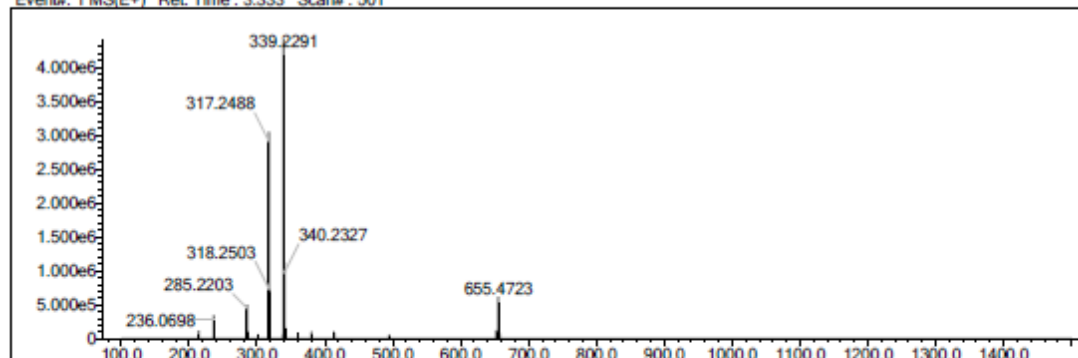

Measured region for 339.2291 m/z

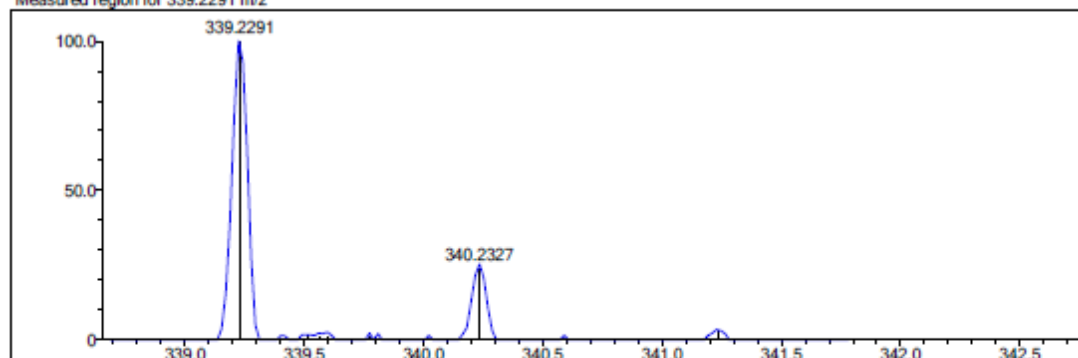

C21 H32 O2 [M+Na]+ : Predicted region for 339.2295 m/z

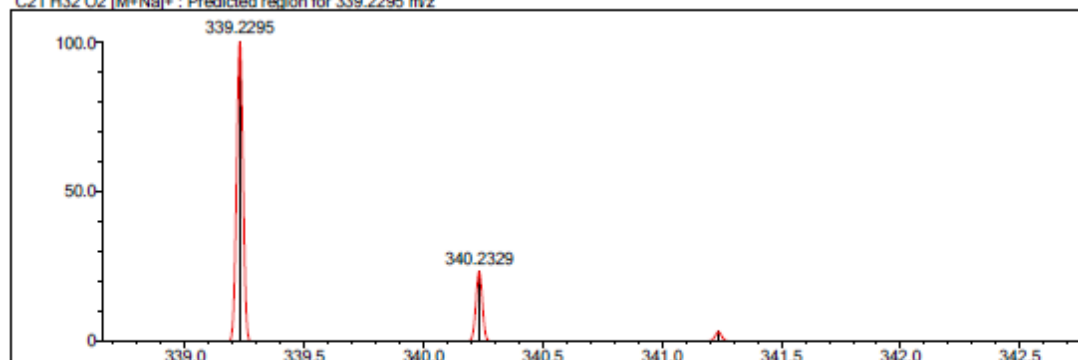

| Rank | Score | Formula (M) | Ion     | Meas. m/z | Pred. m/z | Df. (mDa) | Df. (ppm) | Iso   | DBE |
|------|-------|-------------|---------|-----------|-----------|-----------|-----------|-------|-----|
| 1    | 79.26 | C21 H32 O2  | [M+Na]+ | 339.2291  | 339.2295  | -0.4      | -1.18     | 79.62 | 6.0 |

Figure S25. HRESIMS spectrum of 4

**Table S13.** NMR Data for compounds **1– 2** in CDCl<sub>3</sub>

| Position            | <b>1</b>                                              |                            |                                    | <b>2</b>                                              |                            |                      |
|---------------------|-------------------------------------------------------|----------------------------|------------------------------------|-------------------------------------------------------|----------------------------|----------------------|
|                     | $\delta_{\text{H}}$ ( <i>J</i> in Hz)                 | $\delta_{\text{C}}$ , type | HMBC                               | $\delta_{\text{H}}$ ( <i>J</i> in Hz)                 | $\delta_{\text{C}}$ , type | HMBC                 |
| 1                   | 1.88 (1H, d, <i>J</i> = 13.0 Hz)<br>1.21–1.16 (1H, m) | 39.7, CH <sub>2</sub>      | 3, 5, 20                           | 1.92 (1H, d, <i>J</i> = 12.5 Hz)<br>1.37–1.29 (1H, m) | 39.2, CH <sub>2</sub>      | 3, 5, 20             |
| 2                   | 1.55 (1H, d, <i>J</i> = 13.5 Hz)<br>1.51–1.45 (1H, m) | 18.5, CH <sub>2</sub>      | 1, 3, 4                            | 1.63–1.55 (1H, m)<br>1.56–1.51 (1H, m)                | 18.5, CH <sub>2</sub>      | 1, 3, 4              |
| 3                   | 1.43 (1H, d, <i>J</i> = 12.7 Hz)<br>1.26–1.19 (1H, m) | 41.6, CH <sub>2</sub>      | 1, 2, 4, 5, 18, 19                 | 1.47–1.43 (1H, m)<br>1.29–1.20 (1H, m)                | 41.4, CH <sub>2</sub>      | 1, 2, 4, 5, 19, 18,  |
| 4                   |                                                       | 33.3, C                    |                                    |                                                       | 33.6, C                    |                      |
| 5                   | 1.08 (1H, dd, <i>J</i> = 12.9, 2.6 Hz)                | 54.4, CH                   | 1, 3, 4, 6, 7, 9, 10, 18,<br>19,20 | 1.12 (1H, dd, <i>J</i> = 12.3, 2.5 Hz)                | 53.6, CH                   | 3, 4, 6,7, 9, 10, 20 |
| 6                   | 1.71–1.65 (1H, m)<br>1.16–1.12 (1H, m)                | 19.2, CH <sub>2</sub>      | 4, 5, 7, 8, 10                     | 1.88–1.80 (1H, m)<br>1.56–1.51 (1H, m), overlapped    | 20.9, CH <sub>2</sub>      | 4, 5, 8, 10          |
| 7                   | 2.13–2.03(1H, m)<br>1.74–1.72 (1H, m)                 | 41.4, CH <sub>2</sub>      | 5, 6, 8, 9, 14                     | 2.08–1.97 (1H, m)<br>1.51–1.48 (1H, m), overlapped    | 35.8, CH <sub>2</sub>      | 5, 6, 8, 9, 10, 14,  |
| 8                   |                                                       | 69.5, C                    |                                    |                                                       | 71.7, C                    |                      |
| 9                   | 2.08 (1H, s)                                          | 60.4, CH                   | 1, 8, 10, 11, 12, 14, 20           | 2.33 (1H, s)                                          | 48.1, CH                   | 5, 12, 13, 14        |
| 10                  |                                                       | 37.7, C                    |                                    |                                                       | 39.4, C                    |                      |
| 11                  | 4.23 (1H, s)                                          | 72.0, CH                   | 8, 9, 10, 12, 13                   | 4.15 (1H, s)                                          | 64.8, CH                   | 8, 9, 10, 12         |
| 12                  |                                                       | 196.0, C                   |                                    |                                                       | 85.4, C                    |                      |
| 13                  |                                                       | 133.7, C                   |                                    |                                                       | 166.2, C                   |                      |
| 14                  | 6.71 (1H, s)                                          | 154.2, CH                  | 7, 8, 9, 12, 13 15                 | 4.48 (1H, s)                                          | 55.3, CH                   | 7, 8, 12, 13         |
| 15                  | 3.77 (1H, t, <i>J</i> = 7.2 Hz)                       | 45.7, CH                   | 12, 13, 14, 16, 17                 |                                                       | 127.5, C                   |                      |
| 16                  |                                                       | 170.8, C                   |                                    |                                                       | 165.8, C                   |                      |
| 17                  | 4.41 (2H, d, <i>J</i> = 7.2 Hz)                       | 62.5, CH <sub>2</sub>      | 13,15, 16, 1'                      | 9.97 (1H, s)                                          | 185.0, CH                  | 13, 15               |
| 18                  | 0.91 (3H, s)                                          | 34.0, CH <sub>3</sub>      | 3, 4, 5                            | 0.94 (3H, s)                                          | 33.6, CH <sub>3</sub>      | 3, 4, 5, 19          |
| 19                  | 0.79 (3H, s)                                          | 22.1, CH <sub>3</sub>      | 3, 4, 5, 18                        | 0.85 (3H, s)                                          | 22.0, CH <sub>3</sub>      | 3, 5, 18             |
| 20                  | 0.69 (3H, s)                                          | 17.8, CH <sub>3</sub>      | 1,5, 9, 10                         | 0.80 (3H, s)                                          | 15.6, CH <sub>3</sub>      | 1, 9                 |
| 16–OCH <sub>3</sub> | 3.68 (3H, s)                                          | 52.4, CH <sub>3</sub>      | 16                                 |                                                       |                            |                      |
| 1'                  |                                                       | 171.1, C                   |                                    |                                                       |                            |                      |
| 2'                  | 2.02 (3H, s)                                          | 21.0, CH <sub>3</sub>      | 1'                                 |                                                       |                            |                      |
